# Supplementary material
Source: ML conference proceedings conference paper supplement (https://openreview.net/forum?id=X44OawAq7b)
Supplement: supplementary_material [file attachment]

---

# Provable Acceleration of Nesterov’s Accelerated Gradient for Rectangular Matrix Factorization and Linear Neural Networks

---

Anonymous Author(s)

Affiliation

Address

email

## Abstract

1 We study the convergence rate of first-order methods for rectangular matrix factor-  
2 ization, which is a canonical nonconvex optimization problem. Specifically, given  
3 a rank- $r$  matrix  $\mathbf{A} \in \mathbb{R}^{m \times n}$ , we prove that gradient descent (GD) can find a pair  
4 of  $\epsilon$ -optimal solutions  $\mathbf{X}_T \in \mathbb{R}^{m \times d}$  and  $\mathbf{Y}_T \in \mathbb{R}^{n \times d}$ , where  $d \geq r$ , satisfying  
5  $\|\mathbf{X}_T \mathbf{Y}_T^\top - \mathbf{A}\|_F \leq \epsilon \|\mathbf{A}\|_F$  in  $T = O(\kappa^2 \log \frac{1}{\epsilon})$  iterations with high probability,  
6 where  $\kappa$  denotes the condition number of  $\mathbf{A}$ . Furthermore, we prove that Nesterov’s  
7 accelerated gradient (NAG) attains an iteration complexity of  $O(\kappa \log \frac{1}{\epsilon})$ , which is  
8 the best-known bound of first-order methods for rectangular matrix factorization.  
9 Different from small balanced random initialization in the existing literature, we  
10 adopt an unbalanced initialization, where  $\mathbf{X}_0$  is large and  $\mathbf{Y}_0$  is 0. Moreover,  
11 our initialization and analysis can be further extended to linear neural networks,  
12 where we prove that NAG can also attain an accelerated linear convergence rate. In  
13 particular, we only require the width of the network to be greater than or equal to  
14 the rank of the output label matrix. In contrast, previous results achieving the same  
15 rate require excessive widths that additionally depend on the condition number and  
16 the rank of the input data matrix.

## 17 1 Introduction

18 Nonconvex optimization is pervasive in the training of modern machine learning models. Despite the  
19 success of first-order methods in practice, theoretical understanding of their convergence properties  
20 is limited even for simple nonconvex problems. Take the rectangular low-rank matrix factorization  
21 problem as an example, which is a canonical nonconvex problem:

$$\min_{\mathbf{X} \in \mathbb{R}^{m \times d}, \mathbf{Y} \in \mathbb{R}^{n \times d}} f(\mathbf{X}, \mathbf{Y}) = \frac{1}{2} \|\mathbf{A} - \mathbf{X} \mathbf{Y}^\top\|_F^2, \quad (1)$$

22 where we solve for two small matrices  $\mathbf{X} \in \mathbb{R}^{m \times d}$  and  $\mathbf{Y} \in \mathbb{R}^{n \times d}$  to approximate a big rank- $r$  target  
23 matrix  $\mathbf{A} \in \mathbb{R}^{m \times n}$  with  $r \ll \min(m, n)$  and  $m, n$  not necessarily equal. Specifically, we consider  
24 the over-parameterized regime where  $d \geq r$ , so that the global minimum of (1) is zero. While various  
25 direct methods exist for solving (1), we focus on understanding the global convergence behaviors of  
26 first-order methods applied to such a nonconvex problem, with the motivation of gathering insight  
27 into the training dynamics of neural networks.

28 Most existing results study the simplest first-order method, gradient descent (GD), under different  
29 initialization schemes. Note that the initialization scheme matters to convergence analysis<sup>1</sup>, due to

---

<sup>1</sup>There are some works [Wang et al., 2022, 2023] proving convergence of GD for general initialization under large learning rate and similar objective functions, but nonasymptotic convergence analysis is very challenging and highly dependent on initialization.

the fact that (1) is a nonconvex and nonsmooth<sup>2</sup> optimization problem. Thus, proper initialization is important for the fast convergence rates of first-order methods. Ye and Du [2021] show that with small Gaussian random initialization, GD can find  $\mathbf{X}_T$  and  $\mathbf{Y}_T$  such that  $f(\mathbf{X}_T, \mathbf{Y}_T) \leq \epsilon$  in  $T = O(d^4(m+n)^2\kappa^4 \log \frac{1}{\epsilon})$  iterations with high probability, where  $\kappa$  denotes the condition number. Jiang et al. [2023] improve this result to  $O(\kappa^3 \log \frac{1}{\epsilon})$  which has no explicit dimensional dependence on  $m$  and  $n$ . These analyses rely on balanced initialization where entries of  $\mathbf{X}_0$  and  $\mathbf{Y}_0$  have the same variance so that the iterates are guaranteed to stay in a smooth region.

Moreover, we remark that to the best of our knowledge, we are not aware of any existing theoretical results on rectangular matrix factorization analyzing the global convergence rate of more advanced first-order methods such as Nesterov’s accelerated gradient (NAG), which has been proved to achieve faster rates for smooth convex optimization problems [Nesterov, 2013].

Recently, Ward and Kolda [2023] showed that by using an unbalanced random initialization where  $\mathbf{X}_0$  is larger than  $\mathbf{Y}_0$ , alternating gradient descent (AltGD) that alternately optimizes  $\mathbf{X}_t$  and  $\mathbf{Y}_t$  via gradient steps can achieve  $O(d^2(d-r+1)^2\kappa^2 \log \frac{1}{\epsilon})$  iteration complexity. However, their analysis is specifically designed for AltGD and not applicable to GD, let alone more advanced methods such as NAG which are nevertheless widely used in machine learning practice. Two questions naturally arise here:

Q1: Can GD achieve the same convergence rate as AltGD for (1)?

Q2: Can more advanced first-order methods (e.g., NAG) achieve faster convergence rate for (1)?

• **Main Results.** We answer the two questions above affirmatively by developing a new theory on first-order methods for (1). Specifically, we consider an unbalanced initialization scheme  $\mathbf{X}_0 = c\mathbf{A}\Phi$  and  $\mathbf{Y}_0 = 0$ , where  $c > 0$  is a large constant and  $\Phi$  is a Gaussian random matrix. Note that our initialization of  $\mathbf{X}_0$  is the same as that in Ward and Kolda [2023], but they initialized  $\mathbf{Y}_0$  using a small Gaussian random matrix. This modification is mainly for simpler analysis and makes little difference in practice. Under our new initialization scheme, we first prove an  $O(d^2(d-r+1)^2\kappa^2 \log \frac{1}{\epsilon})$  iteration complexity for GD (Theorem 1), matching that of AltGD in Ward and Kolda [2023]. Our analysis is based on a new theoretical framework different from Ward and Kolda [2023] and can be further extended to analyzing NAG. We then show that NAG can attain a provable acceleration with an  $O(d(d-r+1)\kappa \log \frac{1}{\epsilon})$  iteration complexity (Theorem 2). We discuss the tightness of our results (Remark 1) and conduct numerical experiments for validation (Section 5). Empirically, we observe that NAG exhibits a much faster rate than GD and our bounds are quite tight.

Our analysis technique can also be applied to linear neural networks. We consider unbalanced initialization similar to the one for (1). We show that NAG can achieve an accelerated convergence rate for each overparameterization level (Corollaries 1 to 3), under the commonly adopted interpolation assumption (Assumption 1, see e.g. Du and Hu 2019). In particular, we only require the network width to be greater than the rank of the output matrix.

• **Additional Related Work.** For matrix factorization, there is a large body of works focusing on the *symmetric* case, where  $\mathbf{A}$  is positive semidefinite and  $\mathbf{A} = \mathbf{X}\mathbf{X}^\top$  [Bhojanapalli et al., 2016, Li et al., 2018, Zhou et al., 2020]. However, these analyses are difficult to generalize to the rectangular case (1) due to the additional unbalanced scaling issue<sup>3</sup>. To overcome this, additional *balancing regularization* is often required [Tu et al., 2016, Park et al., 2017], which changes the objective function in (1). Du et al. [2018] show that GD can automatically balance the two factors hence explicit regularization is not necessary, but they only establish linear convergence rate for rank-1 matrix and cannot generalize to rank- $r$  case. Some other works remove this regularization for the general matrix sensing problem and show linear convergence rate for general ranks [Ma et al., 2021, Tong et al., 2021a,b]. These results do not directly apply to our setting as they require singular value decomposition (SVD) at initialization, which consumes roughly the same amount of computation as solving (1). Moreover, these works only consider *exact parameterization* ( $d = r$ ), leaving out the overparameterization regime ( $d > r$ ). Overparameterization may heavily slow down convergence due to the possible singularity of iterates, thus some works consider using preconditioning to get acceleration [Stöger and Soltanolkotabi, 2021, Zhang et al., 2023, Xu et al., 2023]. These preconditioned methods are specifically tailored to symmetric factorization and are not directly comparable with the first-order methods we consider, as their algorithms not only use the gradient.

<sup>2</sup>Here, the nonsmoothness refers to the lack of uniform Lipschitz constant for the gradient in the full domain.

<sup>3</sup>In the symmetric case, the solution’s uniqueness is up to rotation, whereas in (1) it is also up to scaling.

83 For linear neural networks, Du and Hu [2019] and Hu et al. [2020] show linear convergence of GD  
84 with Gaussian and orthogonal initialization respectively. Wang et al. [2021] show that Polyak’s heavy  
85 ball (HB) method [Polyak, 1964] attains accelerated convergence rate with orthogonal initialization.  
86 Liu et al. [2022] further investigate NAG and show a similar accelerated rate for Gaussian initialization.  
87 All these previous works consider sufficiently wide networks that depend on the output dimension,  
88 the rank, and the condition number of input. The results are summarized in Table 1.

Table 1: Results for linear neural networks. All results in table are based on the assumption  $\mathbf{L} = \mathbf{A}\mathbf{D}$  for some  $\mathbf{A}$  with  $\text{cond}(\mathbf{A}) = O(1)$ , where  $\mathbf{D}$  denotes the input data,  $\mathbf{L}$  denotes the output data,  $d_{\text{out}}$  denotes the output dimension,  $\delta$  denote the failure probability,  $r = \text{rank}(\mathbf{D})$ ,  $\bar{r} = \text{rank}(\mathbf{L})$ ,  $\tilde{r} = \|\mathbf{D}\|_{\text{F}}^2 / \|\mathbf{D}\|^2$ ,  $\kappa = \text{cond}^2(\mathbf{D})$ ,  $\kappa_1 = O(\kappa^2)$ ,  $\kappa_2 = O(\kappa)$ .

| Algorithm               | Initialization       | Width                                                                                          | Rate                                 |
|-------------------------|----------------------|------------------------------------------------------------------------------------------------|--------------------------------------|
| GD [Du and Hu, 2019]    | Gaussian             | $\Omega\left(r\kappa^3(d_{\text{out}} + \log \frac{r}{\delta})\right)$                         | $(1 - \frac{3}{4\kappa})^t$          |
| GD [Hu et al., 2020]    | Orthogonal           | $\Omega\left(\tilde{r}\kappa^2(d_{\text{out}} + \log \frac{r}{\delta})\right)$                 | $(1 - \frac{1}{4\kappa})^t$          |
| HB [Wang et al., 2021]  | Orthogonal           | $\Omega\left(\frac{\kappa^5}{\ \mathbf{D}\ ^2}(d_{\text{out}} + \log \frac{r}{\delta})\right)$ | $(1 - \frac{1}{4\sqrt{\kappa}})^t$   |
| NAG [Liu et al., 2022]  | Gaussian             | $\Omega\left(r\kappa^5(d_{\text{out}} + \log \frac{r}{\delta})\right)$                         | $(1 - \frac{1}{2\sqrt{\kappa}})^t$   |
| NAG (ours, Corollary 1) | Unbalanced (12)      | $\geq \bar{r} + \Omega(\log \frac{1}{\delta})$                                                 | $(1 - \frac{1}{2\sqrt{\kappa_1}})^t$ |
| NAG (ours, Corollary 2) | Unbalanced+Orth (13) | $\geq \bar{r}$                                                                                 | $(1 - \frac{1}{2\sqrt{\kappa}})^t$   |
| NAG (ours, Corollary 3) | Unbalanced (14)      | $\geq d_{\text{out}} + \Omega(\log \frac{1}{\delta})$                                          | $(1 - \frac{1}{2\sqrt{\kappa_2}})^t$ |

89 • **Notations.** Throughout this paper,  $\|\cdot\|$  denotes the Euclidean norm of a vector or the spectral  
90 norm of a matrix, and  $\|\cdot\|_{\text{F}}$  denotes the Frobenius norm of a matrix. For any matrix,  $\sigma_i(\cdot)$  denotes  
91 its  $i$ -th largest singular value. For a square matrix,  $\lambda_i(\cdot)$  denotes its  $i$ -th largest eigenvalue. For a  
92 nonzero positive semidefinite matrix,  $\lambda_{\max}(\cdot)$  and  $\lambda_{\min}(\cdot)$  denote its largest and smallest nonzero  
93 eigenvalues respectively. For a matrix  $\mathbf{X}$ , we use  $\text{col}(\mathbf{X})$  to denote its column space,  $\ker(\mathbf{X})$  to denote  
94 its kernel space and define  $\text{cond}(\mathbf{X}) := \|\mathbf{X}\| \|\mathbf{X}^\dagger\|$  as its condition number, where  $\mathbf{X}^\dagger$  denotes the  
95 pseudoinverse of  $\mathbf{X}$ . For any positive integer  $n$ ,  $\mathbf{I}_n$  denotes the identity matrix of size  $n$ . We use  $\otimes$  to  
96 denote the Kronecker product between matrices,  $\oplus$  to denote the direct sum of vector spaces, and  
97  $\text{vec}(\cdot)$  to denote the column-first vectorization of a matrix. We use  $\mathcal{N}(\mu, \sigma^2)$  to denote Gaussian  
98 distribution with mean  $\mu$  and variance  $\sigma^2$ .

## 99 2 Results for Matrix Factorization

100 We start with formalizing our initialization scheme for matrix factorization problem (1). Let  $\Phi \in$   
101  $\mathbb{R}^{n \times d}$  be a Gaussian random matrix with i.i.d. entries  $[\Phi]_{i,j} \sim \mathcal{N}(0, 1/d)$ . We initialize

$$\mathbf{X}_0 = c\mathbf{A}\Phi, \quad \mathbf{Y}_0 = 0, \quad (2)$$

102 where  $c > 0$  is a constant to be specified later. Typically, we require  $c$  to be larger than a certain  
103 threshold, which depends on the dimensions, the extreme singular values of  $\mathbf{A}$ , and possibly the  
104 condition number of  $\mathbf{X}_0$ . We note that changing  $c$  would not affect  $\text{cond}(\mathbf{X}_0)$ , hence there is no  
105 recursive definition. As we mentioned, (2) is a modified version of the initialization in Ward and Kolda  
106 [2023], where we replace the small random Gaussian matrix  $\mathbf{Y}_0$  by 0 and choose  $c$  independently  
107 of the step size. We set  $\mathbf{Y}_0 = 0$  mainly for simplicity, and our analysis can be extended to the case  
108 where  $\mathbf{Y}_0$  is a sufficiently small Gaussian random matrix. While the initialization of  $\mathbf{X}_0$  differs from  
109 standard Gaussian initialization, it has the following interpretation: Suppose we start from  $t = -1$   
110 and let  $\mathbf{X}_{-1} = c'\Phi'$  and  $\mathbf{Y}_{-1} = c''\Phi$  for some  $0 < c' \ll c'' \ll 1$  and Gaussian random matrix  $\Phi'$ ,  
111 then by taking a gradient step with step size  $c/c''$  we get  $\mathbf{X}_0 \approx c\mathbf{A}\Phi$  and  $\mathbf{Y}_0 \approx 0$ . This initialization  
112 of  $\mathbf{X}_0$  also coincides with the first step of randomized singular value decomposition, which is also  
113 referred to as sketching (see e.g. [Halko et al., 2011]).

### 114 2.1 Gradient Descent

115 With initialization (1), we can analyze the global convergence rates of various first-order methods.  
116 Consider gradient descent (GD) first. The gradient of the squared Frobenius error in (1) is given by

$$\nabla_{\mathbf{X}} f(\mathbf{X}, \mathbf{Y}) = (\mathbf{X}\mathbf{Y}^\top - \mathbf{A})\mathbf{Y}, \quad \nabla_{\mathbf{Y}} f(\mathbf{X}, \mathbf{Y}) = (\mathbf{X}\mathbf{Y}^\top - \mathbf{A})^\top \mathbf{X}.$$

For  $t \geq 0$ , the GD update with constant step size  $\eta > 0$  is written as

$$\begin{pmatrix} \mathbf{X}_{t+1} \\ \mathbf{Y}_{t+1} \end{pmatrix} = \begin{pmatrix} \mathbf{X}_t - \eta(\mathbf{X}_t \mathbf{Y}_t^\top - \mathbf{A}) \mathbf{Y}_t \\ \mathbf{Y}_t - \eta(\mathbf{X}_t \mathbf{Y}_t^\top - \mathbf{A})^\top \mathbf{X}_t \end{pmatrix}. \quad (3)$$

Let  $\mathbf{R}_t := \mathbf{X}_t \mathbf{Y}_t^\top - \mathbf{A}$  denote the residual, then  $f(\mathbf{X}_t, \mathbf{Y}_t) = \frac{1}{2} \|\mathbf{R}_t\|_F^2$ . We have the following convergence rate for GD.

**Theorem 1** (GD convergence rate). *For  $0 < \tau < c_1$ , denote  $\delta = 3e^{-(d-r+1) \cdot \min\{\log \frac{1}{c_1 \tau}, c_2, \frac{1}{2}\}}$ , where  $c_1$  and  $c_2$  are universal constants. Denote  $L = \sigma_1^2(\mathbf{X}_0)$ ,  $\mu = \sigma_r^2(\mathbf{X}_0)$ . Let  $\eta = \frac{2}{L+\mu}$ ,  $c \geq \underline{c} := \frac{\sqrt{d}\sigma_r(\mathbf{A})}{12\tau(\sqrt{d}-\sqrt{r-1})} \sqrt{\frac{\text{cond}^4(\mathbf{X}_0)\|\mathbf{A}\|_F}{\text{cond}^2(\mathbf{X}_0)-1}}$  be a sufficiently large constant. Then with  $c$  plugged in initialization (2), GD returns  $\mathbf{X}_t$  and  $\mathbf{Y}_t$  with probability at least  $1 - \delta$  such that*

$$\|\mathbf{R}_t\|_F \leq \frac{3c^2\sigma_1^2(\mathbf{A})}{64\|\mathbf{A}\|_F} \left(1 - \frac{\mu}{L}\right)^t \|\mathbf{A}\|_F.$$

In particular, if  $c = \underline{c}$ , then GD finds  $\|\mathbf{R}_T\|_F \leq \epsilon \|\mathbf{A}\|_F$  in

$$T = O\left(\frac{d^2\kappa^2}{\tau^2(d-r+1)^2} \cdot \log \frac{C}{\epsilon}\right),$$

iterations, where  $C = \frac{27\tau^2(d-r+1)^2}{16d^2} \frac{\text{cond}^4(\mathbf{X}_0)\kappa^2}{\text{cond}^2(\mathbf{X}_0)-1}$ .

Theorem 1 shows that GD converges in  $O(d^2(d-r+1)^{-2}\kappa^2 \log \frac{1}{\epsilon})$  iterations with initialization (2), and the constant prefactor does not have dependence on the ambient dimension  $m$  and  $n$ . This matches the convergence rate for AltGD derived in Ward and Kolda [2023]. The step size  $\frac{2}{L+\mu}$  is commonly used in optimization literature and leads to optimal convergence rate [Nesterov, 2013].

## 2.2 Nesterov's Accelerated Gradient

We then consider Nesterov's accelerated gradient (NAG) method [Nesterov, 2013] applied to (1). We take the form of NAG that is originally designed for smooth strongly convex loss function  $\ell$ :

$$z_{t+1} = \tilde{z}_t - \eta \nabla \ell(\tilde{z}_t), \quad \tilde{z}_{t+1} = z_{t+1} + \beta(z_{t+1} - x_t),$$

where  $\eta$  is the step size,  $\beta$  is the momentum parameter, and  $z$  or  $\tilde{z}$  in our case consists of both  $\mathbf{X}$  and  $\mathbf{Y}$ . If we focus on the  $\{\tilde{z}_t\}$  sequence with  $\tilde{z}_t = (\mathbf{X}_t, \mathbf{Y}_t)$  and plug in the objective function in (1), then with  $\mathbf{X}_{-1} = \mathbf{X}_0$  and  $\mathbf{Y}_{-1} = \mathbf{Y}_0$ , the NAG update is given by

$$\begin{pmatrix} \mathbf{X}_{t+1} \\ \mathbf{Y}_{t+1} \end{pmatrix} = \begin{pmatrix} (1+\beta)(\mathbf{X}_t - \eta \mathbf{R}_t \mathbf{Y}_t) - \beta(\mathbf{X}_{t-1} - \eta \mathbf{R}_{t-1} \mathbf{Y}_{t-1}) \\ (1+\beta)(\mathbf{Y}_t - \eta \mathbf{R}_t^\top \mathbf{X}_t) - \beta(\mathbf{Y}_{t-1} - \eta \mathbf{R}_{t-1}^\top \mathbf{X}_{t-1}) \end{pmatrix}. \quad (4)$$

We have the following convergence rate for NAG.

**Theorem 2** (NAG convergence rate). *For  $0 < \tau < c_1$ , define  $\delta$  as in Theorem 1. Denote  $L = \sigma_1^2(\mathbf{X}_0)$ ,  $\mu = \sigma_r^2(\mathbf{X}_0)$ . Let  $\eta = \frac{1}{L}$ ,  $\beta = \frac{\sqrt{L}-\sqrt{\mu}}{\sqrt{L}+\sqrt{\mu}}$ ,  $c \geq \underline{c} := 29\sqrt{\frac{d(2\sqrt{d}+\sqrt{r})\|\mathbf{A}\|_F \cdot \kappa}{\tau^3(\sqrt{d}-\sqrt{r-1})^3\sigma_r^2(\mathbf{A})}}$  be a constant. Then with  $c$  plugged in initialization (2), NAG returns  $\mathbf{X}_t$  and  $\mathbf{Y}_t$  with probability at least  $1 - \delta$  such that*

$$\|\mathbf{R}_t\|_F \leq \frac{c^2\sigma_1^2(\mathbf{A})}{64\|\mathbf{A}\|_F \text{cond}(\mathbf{X}_0)} \left(1 - \frac{\sqrt{\mu}}{2\sqrt{L}}\right)^t \|\mathbf{A}\|_F.$$

In particular, if  $c = \underline{c}$  then GD finds  $\|\mathbf{R}_T\|_F \leq \epsilon \|\mathbf{A}\|_F$  in

$$T = O\left(\frac{d\kappa}{\tau(d-r+1)} \cdot \log \frac{C}{\epsilon}\right),$$

iterations, where  $C = \frac{841d(2\sqrt{d}+\sqrt{r})}{64\tau^3(\sqrt{d}-\sqrt{r-1})^3} \cdot \frac{\kappa^3}{\text{cond}(\mathbf{X}_0)}$ .

Theorem 2 shows that NAG can achieve  $O(d(d-r+1)^{-1}\kappa \log \frac{1}{\epsilon})$  iteration complexity with high probability. The dependence on the condition number  $\kappa$  is improved from being quadratic to linear. Moreover, the dependence on the dimension is also improved. As shown in Theorem 1, the GD iteration number has an  $O(d^2)$  dependence in the worst case ( $d = r$ ). Here, NAG has at most  $O(d)$  dependence. The level of overparameterization  $d$  will affect both the convergence rate and the probability of success. To ensure a small fail probability  $\delta$ , it requires  $d = r - 1 + \Omega(\log \frac{1}{\delta})$ . Again,

the step size  $\frac{1}{L}$  and momentum  $\frac{\sqrt{L}-\sqrt{\mu}}{\sqrt{L}+\sqrt{\mu}}$  are commonly used in the literature [Nesterov, 2013].

### 3 Proof Sketch for Convergence Rates

We now provide the proof sketch for Theorems 1 and 2. Our proof is based on induction. We start with the assumptions that  $\mathbf{X}_t$  and  $\mathbf{Y}_t$  are not too far from  $\mathbf{X}_0$  and  $\mathbf{Y}_0$  respectively and the initial residual is bounded by some constant, which are guaranteed at time  $t = 0$ . Given the induction assumptions, we then track the dynamics of residual  $\mathbf{R}_t$  and decompose it into linear and higher-order parts. We can show that the linear part is contracted and the higher-order part shrinks exponentially, together implying that  $\|\mathbf{R}_{t+1}\|_F = O(\theta^t)$  for some  $\theta \in (0, 1)$  and  $\mathbf{X}_{t+1}$  and  $\mathbf{Y}_{t+1}$  is still within a bounded region around initialization. This shows the induction assumptions for the next iterate, thus by invoking the induction we complete the proof.

The key to our proof is to show the contraction and its rate. Firstly, the linear part of the dynamics is not a contraction over the whole space, thus we need to identify in which subspace it is a contraction. Secondly, we need to quantify the rate of contraction to get global convergence rates. These necessitate the following proposition about the properties of  $\mathbf{X}_0$  with initialization (2).

**Proposition 1.** *For any  $\tau, c > 0$ ,  $\mathbf{A} \in \mathbb{R}^{m \times n}$  being a rank- $r$  matrix with condition number  $\kappa := \text{cond}(\mathbf{A})$ ,  $\Phi \in \mathbb{R}^{n \times d}$  being a random matrix with i.i.d. entries from  $\mathcal{N}(0, 1/d)$ , the following holds for  $\mathbf{X}_0 = c\mathbf{A}\Phi$  with probability at least  $1 - \delta$ :*

$$\frac{\tau(\sqrt{d} - \sqrt{r-1})}{\sqrt{d}} c \cdot \sigma_r(\mathbf{A}) \leq \sigma_r(\mathbf{X}_0) \leq \sigma_1(\mathbf{X}_0) \leq \frac{2\sqrt{d} + \sqrt{r}}{\sqrt{d}} c \cdot \sigma_1(\mathbf{A}),$$

where  $\delta = 3e^{-\min\{(d-r+1) \log \frac{1}{c_1\tau}, c_2d, \frac{d}{2}\}}$ ,  $c_1$  and  $c_2$  are universal constants. When it holds, the condition number of  $\mathbf{X}_0$  is bounded:

$$\text{cond}(\mathbf{X}_0) \leq \frac{2\sqrt{d} + \sqrt{r}}{\tau(\sqrt{d} - \sqrt{r-1})} \cdot \kappa \leq \frac{6d}{\tau(d-r+1)} \cdot \kappa.$$

By Proposition 1, the top singular value of  $\mathbf{X}_0$  is bounded from above by  $\sigma_1(\mathbf{A})$ , and the  $r$ -th singular value of  $\mathbf{X}_0$  is bounded from below by  $\sigma_r(\mathbf{A})$ , hence we have  $\text{cond}(\mathbf{X}_0) = O(\kappa)$ . Moreover,  $\mathbf{X}_0$  has rank  $r$  with probability 1 and thus it preserves the column space of  $\mathbf{A}$ , i.e.,  $\text{col}(\mathbf{X}_0) = \text{col}(\mathbf{A})$ . This subspace preservation property will be passed to subsequent iterations of first-order methods and is critical to our analysis. In particular, we will show this space corresponds to the contraction subspace.

#### 3.1 Proof Sketch for GD Convergence Rate (Theorem 1)

As mentioned, we track the dynamics of  $\mathbf{R}_t$  for GD to prove Theorem 1. Let  $\mathbf{r}_t = \text{vec}(\mathbf{R}_t)$  denote the vectorized residual, then the GD update (3) corresponds to the following dynamics:

**Proposition 2** (GD dynamics). *Let  $\mathbf{P}_t = \mathbf{X}_{t+1} - \mathbf{X}_t$  and  $\mathbf{Q}_t = \mathbf{Y}_{t+1} - \mathbf{Y}_t$  denote the update steps for  $t \geq 0$ . Then GD (3) admits the following dynamics:*

$$\mathbf{r}_{t+1} = (\mathbf{I}_{mn} - \eta\mathbf{H}_0)\mathbf{r}_t + \boldsymbol{\xi}_t, \quad (5)$$

where  $\mathbf{H}_t = (\mathbf{Y}_t\mathbf{Y}_t^\top) \otimes \mathbf{I}_m + \mathbf{I}_n \otimes (\mathbf{X}_t\mathbf{X}_t^\top)$  and  $\boldsymbol{\xi}_t = \eta(\mathbf{H}_0 - \mathbf{H}_t)\mathbf{r}_t + \text{vec}(\mathbf{P}_t\mathbf{Q}_t^\top)$ .

The linear part at time  $t$  is  $(\mathbf{I}_{mn} - \eta\mathbf{H}_t)\mathbf{r}_t$ , which is approximately  $(\mathbf{I}_{mn} - \eta\mathbf{H}_0)\mathbf{r}_t$  when  $\mathbf{X}_t$  and  $\mathbf{Y}_t$  are close to their initialization. The approximation error along with the higher-order term  $\text{vec}(\mathbf{P}_t\mathbf{Q}_t^\top)$  is contained in  $\boldsymbol{\xi}_t$ . It follows immediately from Proposition 2 that

$$\mathbf{r}_{t+1} = (\mathbf{I}_{mn} - \eta\mathbf{H}_0)^{t+1}\mathbf{r}_0 + \sum_{s=0}^t (\mathbf{I}_{mn} - \eta\mathbf{H}_0)^{t-s}\boldsymbol{\xi}_s.$$

If  $\mathbf{T}_{\text{GD}} := \mathbf{I}_{mn} - \eta\mathbf{H}_0$  is a contraction map, i.e., it has top eigenvalue  $|\lambda_1(\mathbf{T}_{\text{GD}})| \leq \rho$  for some  $\rho \in [0, 1)$ , and the nonlinear error  $\boldsymbol{\xi}_t$  shrinks exponentially at rate  $\theta \in (\rho, 1)$ , then we have  $\|\mathbf{r}_t\| = O(\theta^t)$ . However, for  $d < \min(m, n)/2$ ,  $\mathbf{T}_{\text{GD}}$  cannot be a contraction map for any  $\eta$ , as the rank of  $\mathbf{H}_0$  is at most  $(m+n)d < mn$ . In fact, if  $\mathbf{X}_0$  is initialized as in (2), then  $\text{rank}(\mathbf{H}_0) = nr < mn$  regardless of the choice of  $d$ . As  $\mathbf{H}_0$  has no full rank,  $\mathbf{T}_{\text{GD}}$  must have a non-trivial eigensubspace corresponding to eigenvalue 1. In the following lemma, we show that  $\mathbf{r}_t$  and  $\boldsymbol{\xi}_t$  are not in this “bad” subspace but rather in a contracted subspace as desired.

**Lemma 1** (Eigensubspace). *Let  $\mathcal{H} \subseteq \mathbb{R}^{mn}$  denote the linear subspace containing all eigenvectors of  $\mathbf{H}_0$  with positive eigenvalues. If  $\mathbf{X}_0$  is initialized as in (2), then we have*

$$\mathcal{H} = (\text{col}(\mathbf{A}))^n \quad \text{and} \quad \{\mathbf{r}_t, \boldsymbol{\xi}_t\}_{t \geq 0} \subset \mathcal{H},$$

where  $\mathbf{H}_0$ ,  $\mathbf{r}_t$  and  $\boldsymbol{\xi}_t$  are defined as in Proposition 2.

Given that  $\mathbf{r}_t$  and  $\boldsymbol{\xi}_t$  are in the contracted subspace  $\mathcal{H}$  throughout all iterations, the convergence rate is determined by the contractivity of  $\mathbf{T}_{\text{GD}}$  over this subspace, which corresponds to the condition number of  $\mathbf{X}_0$  with initialization (2).

**Lemma 2** (GD contractivity). *Let  $L = \sigma_1^2(\mathbf{X}_0)$ ,  $\mu = \sigma_r^2(\mathbf{X}_0)$ , and  $\mathcal{H}$  be defined as in Lemma 1. Let  $\eta \in (0, \frac{2}{L})$ , then for any  $\mathbf{v} \in \mathcal{H}$ ,*

$$\|\mathbf{T}_{\text{GD}}\mathbf{v}\| \leq \max\{|1 - \eta L|, |1 - \eta\mu|\} \|\mathbf{v}\|.$$

In particular, if  $\eta = \frac{2}{L+\mu}$ , then  $\|\mathbf{T}_{\text{GD}}\mathbf{v}\| \leq \frac{L-\mu}{L+\mu} \|\mathbf{v}\|$ .

By Lemmas 1 and 2, the linear part of GD dynamics contracts  $\mathbf{r}_t$  and  $\boldsymbol{\xi}_t$ , and the rate of contraction is  $\rho = \max\{|1 - \eta L|, |1 - \eta\mu|\}$ . To complete the proof, it remains to bound the magnitude of error  $\boldsymbol{\xi}_t$  and show induction conditions for the next iteration. This is guaranteed by the following lemma.

**Lemma 3** (Nonlinear error). *If there exist  $\theta \in (0, 1)$  and some constants  $C_1$  and  $C_2$  such that for any  $s \leq t$ , the GD dynamics (5) yields  $\|\mathbf{r}_s\| \leq C_1\theta^s \|\mathbf{r}_0\|$ ,  $\|\mathbf{X}_s - \mathbf{X}_0\|_{\text{F}} \leq C_2$ ,  $\|\mathbf{Y}_s - \mathbf{Y}_0\|_{\text{F}} \leq C_2$ , then we have*

$$\|\text{vec}(\mathbf{P}_s \mathbf{Q}_s^\top)\| \leq C_3 \theta^{2s} \|\mathbf{r}_0\|^2 \quad \text{and} \quad \|\eta(\mathbf{H}_0 - \mathbf{H}_s)\mathbf{r}_s\| \leq C_4 \theta^s \|\mathbf{r}_0\|$$

for some constants  $C_3$  and  $C_4$  depending on  $C_1$  and  $C_2$ . Moreover, if  $C_1$  and  $C_2$  satisfy

$$(\max(\|\mathbf{X}_0\|, \|\mathbf{Y}_0\|) + C_2) \eta C_1 \|\mathbf{r}_0\| \leq (1 - \theta) C_2, \quad (6)$$

then we have  $\|\mathbf{X}_{t+1} - \mathbf{X}_0\|_{\text{F}} \leq C_2$  and  $\|\mathbf{Y}_{t+1} - \mathbf{Y}_0\|_{\text{F}} \leq C_2$ .

Lemma 3 shows that  $\|\boldsymbol{\xi}_t\| = O(\theta^t)$  if the residual shrinks exponentially and the iterates are not too far from initialization, which in turn implies that  $\mathbf{X}_{t+1}$  and  $\mathbf{Y}_{t+1}$  are also within the  $C_2$ -balls around their initialization. It turns out that there is a set of valid coefficients for the induction to go through as long as the  $c$  in (2) is sufficiently large. Therefore, by choosing  $c$  properly and plugging in  $\rho = \frac{L-\mu}{L+\mu}$  and  $\theta = 1 - \frac{\mu}{L}$ , we prove Theorem 1 for GD. The complete proof is provided in Appendix B.6.

### 3.2 Proof Sketch for NAG Convergence Rate (Theorem 2)

We now turn to prove Theorem 2. Similar to GD, we track the residual dynamics of NAG.

**Proposition 3** (NAG dynamics). *Let  $\mathbf{P}_t = \mathbf{X}_{t+1} - \mathbf{X}_t$  and  $\mathbf{Q}_t = \mathbf{Y}_{t+1} - \mathbf{Y}_t$  denote the update steps for  $t \geq 0$ . Then NAG (4) admits the following dynamics:*

$$\begin{pmatrix} \mathbf{r}_{t+1} \\ \mathbf{r}_t \end{pmatrix} = \begin{pmatrix} (1 + \beta)(\mathbf{I}_{mn} - \eta\mathbf{H}_0) & -\beta(\mathbf{I}_{mn} - \eta\mathbf{H}_0) \\ \mathbf{I}_{mn} & 0 \end{pmatrix} \begin{pmatrix} \mathbf{r}_t \\ \mathbf{r}_{t-1} \end{pmatrix} + \begin{pmatrix} \boldsymbol{\xi}_t \\ 0 \end{pmatrix}, \quad (7)$$

where  $\mathbf{H}_t = (\mathbf{Y}_t \mathbf{Y}_t^\top) \otimes \mathbf{I}_m + \mathbf{I}_n \otimes (\mathbf{X}_t \mathbf{X}_t^\top)$ ,  $\boldsymbol{\xi}_t = \boldsymbol{\zeta}_t + \boldsymbol{\iota}_t$ ,

$$\boldsymbol{\zeta}_t = \text{vec}(\mathbf{P}_t \mathbf{Q}_t^\top) + \beta \text{vec}(\mathbf{P}_{t-1} \mathbf{Q}_{t-1}^\top) + \beta \eta \text{vec}(\mathbf{R}_{t-1} \mathbf{Y}_{t-1} \mathbf{Q}_{t-1}^\top + \mathbf{P}_{t-1} \mathbf{X}_{t-1}^\top \mathbf{R}_{t-1}),$$

$$\boldsymbol{\iota}_t = (1 + \beta)\eta(\mathbf{H}_0 - \mathbf{H}_t)\mathbf{r}_t - \beta\eta(\mathbf{H}_0 - \mathbf{H}_{t-1})\mathbf{r}_{t-1}.$$

As Proposition 3 shows, NAG dynamics (7) has additional momentum terms involving  $\mathbf{P}_t$  and  $\mathbf{Q}_t$ . When  $\beta = 0$ , it reduces to the GD dynamics (5). The introduction of momentum terms allows the linear part in (7) to contract  $\mathbf{r}_t$  and  $\boldsymbol{\xi}_t$  faster. To be more explicit, let

$$\mathbf{T}_{\text{NAG}} := \begin{pmatrix} (1 + \beta)(\mathbf{I}_{mn} - \eta\mathbf{H}_0) & -\beta(\mathbf{I}_{mn} - \eta\mathbf{H}_0) \\ \mathbf{I}_{mn} & 0 \end{pmatrix} \quad (8)$$

denote the linear part of the system. The next lemma shows NAG improves the rate of contraction.

**Lemma 4** (NAG contractivity). *Let  $\eta = \frac{1}{L}$ ,  $\beta = \frac{\sqrt{L} - \sqrt{\mu}}{\sqrt{L} + \sqrt{\mu}}$ , then for all  $(\mathbf{u}, \mathbf{v}) \in \mathcal{H} \times \mathcal{H}$ ,*

$$\left\| \mathbf{T}_{\text{NAG}} \begin{pmatrix} \mathbf{u} \\ \mathbf{v} \end{pmatrix} \right\| \leq \left( 1 - \sqrt{\frac{\mu}{L}} \right) \left\| \begin{pmatrix} \mathbf{u} \\ \mathbf{v} \end{pmatrix} \right\|.$$

The price to pay for the faster rate of contraction is the additional perturbations. The  $\boldsymbol{\iota}_t$  term characterizes dynamics shift, which can be controlled as GD in Lemma 3. The  $\boldsymbol{\zeta}_t$  term characterizes higher-order terms in the dynamics (7), which can be controlled by the updates  $\mathbf{P}_t$  and  $\mathbf{Q}_t$ . In GD, these terms correspond to the gradient so that they can be bounded if  $\mathbf{R}_t$  shrinks and  $\mathbf{X}_t$  and  $\mathbf{Y}_t$  are not too far away from  $\mathbf{X}_0$  and  $\mathbf{Y}_0$ . In NAG, we have

$$\mathbf{P}_t = \eta \mathbf{R}_t \mathbf{Y}_t + \eta \sum_{s=1}^t \beta^{t-s+1} \mathbf{R}_s \mathbf{Y}_s$$

and a similar equation holds for  $\mathbf{Q}_t$ . If  $\mathbf{R}_t$  shrinks at rate  $\theta > \theta^2 \geq \beta$ , then we have an  $O(\theta^t)$  upper bound for  $\|\mathbf{P}_t\|_{\text{F}}$  and  $\|\mathbf{Q}_t\|_{\text{F}}$ . We formalize the argument in the following induction lemma.

227 **Lemma 5.** Suppose  $0 < \beta \leq \theta^2 < \theta < 1$ . If there exist some constants  $C_1$  and  $C_2$  such that for  
 228 any  $s \leq t$ , the NAG dynamics (7) yields  $\left\| \begin{pmatrix} \mathbf{r}_s \\ \mathbf{r}_{s-1} \end{pmatrix} \right\| \leq C_1 \theta^s \left\| \begin{pmatrix} \mathbf{r}_0 \\ \mathbf{r}_{-1} \end{pmatrix} \right\|$ ,  $\|\mathbf{X}_s - \mathbf{X}_0\|_F \leq C_2$ , and  
 229  $\|\mathbf{Y}_s - \mathbf{Y}_0\|_F \leq C_2$ , then we have

$$\|\zeta_t\| \leq C_3 \theta^{2t} \left\| \begin{pmatrix} \mathbf{r}_0 \\ \mathbf{r}_{-1} \end{pmatrix} \right\|^2, \quad \text{and} \quad \|\iota_t\| \leq C_4 \theta^t \left\| \begin{pmatrix} \mathbf{r}_0 \\ \mathbf{r}_{-1} \end{pmatrix} \right\|$$

230 for some constants  $C_3$  and  $C_4$  depending on  $C_1$  and  $C_2$ . Moreover, if  $C_1$  and  $C_2$  satisfy

$$(\max(\|\mathbf{X}_0\|, \|\mathbf{Y}_0\|) + C_2) \eta C_1 \left\| \begin{pmatrix} \mathbf{r}_0 \\ \mathbf{r}_{-1} \end{pmatrix} \right\| \leq (1 - \theta)^2 C_2, \quad (9)$$

231 then we have  $\|\mathbf{X}_{t+1} - \mathbf{X}_0\|_F \leq C_2$  and  $\|\mathbf{Y}_{t+1} - \mathbf{Y}_0\|_F \leq C_2$ .

232 Lemma 5 is similar to Lemma 3. Again by choosing a sufficiently large  $c$  to initialize  $\mathbf{X}_0$ , we can find  
 233 a set of feasible coefficients for the induction. In particular, we plug in  $\rho = 1 - \frac{\sqrt{\mu}}{\sqrt{L}}$ ,  $\theta = 1 - \frac{\sqrt{\mu}}{2\sqrt{L}}$   
 234 and  $\beta = \frac{\sqrt{L} - \sqrt{\mu}}{\sqrt{L} + \sqrt{\mu}}$ , then  $\underline{c}$  defined in Theorem 2 ensures the success of induction, hence the accelerated  
 235 convergence rate of NAG is proved. The complete proof is provided in Appendix C.4.

236 **Remark 1.** Our analysis differs from that of Ward and Kolda [2023]. Their analysis is based on  
 237 the Polyak-Łojasiewicz (PL) inequality [Łojasiewicz, 1963]:  $f(\mathbf{X}_t, \mathbf{Y})$  is approximately  $\mu$ -PL and  
 238  $L$ -smooth in  $\mathbf{Y}$ , and the unbalanced initialization (large  $\mathbf{X}_0$  small  $\mathbf{Y}_0$ ) ensures that only  $\mathbf{Y}$  matters  
 239 to the convergence rate, as  $\mathbf{X}$  is not changing by much. Since the objective function in (1) is quadratic  
 240 in  $\mathbf{X}$ , the problem has condition number  $\hat{\kappa} := \frac{L}{\mu} = O(\kappa^2)$ . With these notations, the complexity in  
 241 Ward and Kolda [2023] reads as  $O(\hat{\kappa} \log \frac{1}{\epsilon})$ , which is standard for PL functions.

242 However, PL inequality cannot fully capture the properties of (1), and the analysis in Ward and  
 243 Kolda [2023] does not apply to the case where  $\mathbf{X}_t$  and  $\mathbf{Y}_t$  are updated simultaneously rather than  
 244 alternatingly. In fact, if we fix  $\mathbf{X} \equiv \mathbf{X}_0$  and optimize  $\mathbf{Y}$  only, then our initialization (2) makes the  
 245 problem quasi-strongly convex (QSC), which is strictly stronger than PL [Necoara et al., 2019]. For  
 246 QSC functions, NAG can achieve  $O(\sqrt{\hat{\kappa}} \log \frac{1}{\epsilon})$  convergence rate Necoara et al. [2019], while for PL  
 247 functions the rate can only be  $\Omega(\hat{\kappa} \log \frac{1}{\epsilon})$  [Yue et al., 2023].

248 We note that simultaneously optimizing  $\mathbf{X}$  and  $\mathbf{Y}$  causes the nonconvexity issue and hence (1) does  
 249 not fit in the framework for QSC functions as it requires convexity. Our results in Theorems 1 and 2  
 250 match the ones for QSC functions and Theorem 2 further matches the lower bound for general smooth  
 251 strongly convex functions [Nemirovski and Yudin, 1983], which generally exhibit more favorable  
 252 properties than nonconvex optimization problems to which (1) belongs. Hence, we conjecture that  
 253 our rate bounds are tight for both GD and NAG. However, rigorous theory is yet to be constructed to  
 254 solidify our conjecture.

## 255 4 Extension to Linear Neural Network

256 Our analysis can be extended to the mean-square-loss training of two-layer linear neural networks,  
 257 which is equivalent to the following optimization problem:

$$\min_{\mathbf{X} \in \mathbb{R}^{m \times d}, \mathbf{Y} \in \mathbb{R}^{n \times d}} f(\mathbf{X}, \mathbf{Y}) = \frac{1}{2} \|\mathbf{L} - \mathbf{X}\mathbf{Y}^\top \mathbf{D}\|_F^2. \quad (10)$$

258 Here,  $\mathbf{D} \in \mathbb{R}^{n \times N}$  corresponds to all input data concatenated together,  $\mathbf{L} \in \mathbb{R}^{m \times N}$  denotes the labels,  
 259  $N$  is the total number of training data samples, and  $d$  is the network width. We make the following  
 260 interpolation assumption, which is commonly adopted in the study of the convergence rate of linear  
 261 neural networks [Du and Hu, 2019, Hu et al., 2020, Wang et al., 2021].

262 **Assumption 1** (Interpolation). There is  $\mathbf{A}$  with  $\text{cond}(\mathbf{A}) = O(1)$  such that  $\mathbf{L} = \mathbf{A}\mathbf{D}$ ,  $\text{rank}(\mathbf{L}) = r$ .

263 Under Assumption 1, we can establish a linear convergence rate for NAG when the initialization is  
 264 sufficiently unbalanced and  $\mathbf{X}_0$  contains the column space of  $\mathbf{L}$ .

265 **Theorem 3.** Let  $\tilde{L} = \sigma_1^2(\mathbf{X}_0) \cdot \lambda_{\max}(\mathbf{D}\mathbf{D}^\top)$ ,  $\tilde{\mu} = \sigma_r^2(\mathbf{X}_0) \cdot \lambda_{\min}(\mathbf{D}\mathbf{D}^\top)$ . Suppose  $\mathbf{Y}_0 = 0$ ,  $\mathbf{X}_0$  is  
 266 initialized such that  $\text{col}(\mathbf{X}_0) \supseteq \text{col}(\mathbf{L})$  and it satisfies

$$\tilde{\mu} p \geq 4\sqrt{2} \|\mathbf{L}\mathbf{D}^\top\|_F (1 + p), \quad (11)$$

where  $p = \frac{\sqrt{\mu}}{144\sqrt{L}}$  does not depend on the scaling of  $\mathbf{X}_0$ . If we choose  $\eta = \frac{1}{L}$  and  $\beta = \frac{\sqrt{L}-\sqrt{\mu}}{\sqrt{L}+\sqrt{\mu}}$ , then the  $t$ -th iterate of NAG ( $\mathbf{X}_t$  and  $\mathbf{Y}_t$ ) will correspond to residual  $\mathbf{R}_t = \mathbf{X}_t \mathbf{Y}_t^\top \mathbf{D} - \mathbf{L}$  satisfying

$$\|\mathbf{R}_t\|_F \leq \frac{\sigma_r^2(\mathbf{X}_0)\sigma_{\min}(\mathbf{D})}{576\|\mathbf{LD}^\top\|_F} \left(1 - \frac{\sqrt{\mu}}{2\sqrt{L}}\right)^t \|\mathbf{LD}^\top\|_F.$$

Equivalently, let  $C = \frac{\sigma_r^2(\mathbf{X}_0)\sigma_{\min}(\mathbf{D})}{576\|\mathbf{LD}^\top\|_F}$ , then the iteration complexity for  $\epsilon$  relative error is

$$T = O\left(\frac{\sigma_1(\mathbf{X}_0)\sqrt{\lambda_{\max}(\mathbf{DD}^\top)}}{\sigma_r(\mathbf{X}_0)\sqrt{\lambda_{\min}(\mathbf{DD}^\top)}} \log\left(\frac{C}{\epsilon}\right)\right).$$

As Theorem 3 shows, if our initialization guarantees the column space of  $\mathbf{X}_0$  contains columns of  $\mathbf{L}$ , then the residual shrinks at a linear rate. In the worst case, the columns of  $\mathbf{L}$  span the whole space of  $\mathbb{R}^m$ , hence  $d$  should be at least  $m$ . However, when the data exhibits some low-dimensional properties, e.g.,  $\mathbf{D}$  is low-rank, then  $r$  can be much smaller than  $m$  and  $N$ . In this case, an initialization similar to (2) can meet the requirement of Theorem 3. Moreover, note that the convergence rate depends on both  $\mathbf{D}$  and  $\mathbf{X}_0$ , hence by orthonormalization we can make  $\text{cond}(\mathbf{X}_0) = 1$  for a faster rate. When  $r \leq d \ll \min(m, N)$ , such orthonormalization is affordable as it takes  $O(md^2)$  time rather than  $O(mN^2)$  in the worst case. We summarize these initialization options:

$$d \geq r, \quad \Phi \in \mathbb{R}^{N \times d}, \quad [\Phi]_{i,j} \sim \mathcal{N}(0, 1/d), \quad \mathbf{X}_0 = c \cdot \mathbf{L}\Phi, \quad \mathbf{Y}_0 = 0; \quad (12)$$

$$d \geq r, \quad \Phi \in \mathbb{R}^{N \times d}, \quad [\Phi]_{i,j} \sim \mathcal{N}(0, 1/d), \quad \mathbf{X}_0 = c \cdot \text{Orth}(\mathbf{L}\Phi), \quad \mathbf{Y}_0 = 0; \quad (13)$$

$$d \geq m, \quad \Phi \in \mathbb{R}^{m \times d}, \quad [\Phi]_{i,j} \sim \mathcal{N}(0, 1/d), \quad \mathbf{X}_0 = c \cdot \Phi, \quad \mathbf{Y}_0 = 0; \quad (14)$$

Here,  $\text{Orth}(\cdot)$  denotes the orthonormalization result whose columns are orthonormal. By applying singular value bounds and invoking Theorem 3, we obtain the following corollaries.

**Corollary 1.** Suppose initialization (12) is applied with some sufficiently large  $c$ . For any  $0 < \tau < c_1$ ,  $0 < \delta < 1$ , if  $d \geq r - 1 + \Omega(\log \frac{1}{\delta})$ , then with probability at least  $1 - \delta$ , NAG finds  $\mathbf{X}_T$  and  $\mathbf{Y}_T$  such that  $f(\mathbf{X}_T, \mathbf{Y}_T) \leq \epsilon \|\mathbf{LD}^\top\|_F^2$  where

$$T = O\left(\frac{d \cdot \text{cond}(\mathbf{L})}{\tau(d - r + 1)} \frac{\sqrt{\lambda_{\max}(\mathbf{DD}^\top)}}{\sqrt{\lambda_{\min}(\mathbf{DD}^\top)}} \log \frac{1}{\epsilon}\right).$$

**Corollary 2.** Suppose initialization (13) is applied with some sufficiently large  $c$ . If  $d \geq r$ , then with probability 1, NAG finds  $\mathbf{X}_T$  and  $\mathbf{Y}_T$  such that  $f(\mathbf{X}_T, \mathbf{Y}_T) \leq \epsilon \|\mathbf{LD}^\top\|_F^2$  where

$$T = O\left(\sqrt{\frac{\lambda_{\max}(\mathbf{DD}^\top)}{\lambda_{\min}(\mathbf{DD}^\top)}} \log \frac{1}{\epsilon}\right).$$

**Corollary 3.** Suppose initialization (14) is applied with some sufficiently large  $c$ . For any  $0 < \tau < c_1$ ,  $0 < \delta < 1$ , if  $d \geq m - 1 + \Omega(\log \frac{1}{\delta})$ , then with probability at least  $1 - \delta$ , NAG finds  $\mathbf{X}_T$  and  $\mathbf{Y}_T$  such that  $f(\mathbf{X}_T, \mathbf{Y}_T) \leq \epsilon \|\mathbf{LD}^\top\|_F^2$  where

$$T = O\left(\frac{d}{\tau(d - m + 1)} \frac{\sqrt{\lambda_{\max}(\mathbf{DD}^\top)}}{\sqrt{\lambda_{\min}(\mathbf{DD}^\top)}} \log \frac{1}{\epsilon}\right).$$

**Remark 2.** While we only consider NAG in this section, our analysis can be directly applied to GD and obtain  $O\left(\frac{\sigma_r^2(\mathbf{X}_0)\lambda_{\max}(\mathbf{DD}^\top)}{\sigma_r^2(\mathbf{X}_0)\lambda_{\min}(\mathbf{DD}^\top)} \log \frac{1}{\epsilon}\right)$  convergence rate with initializations (12) to (14).

Corollaries 2 and 3 show accelerated convergence rate of NAG, as their dependence on the condition number  $\kappa := \frac{\lambda_{\max}(\mathbf{DD}^\top)}{\lambda_{\min}(\mathbf{DD}^\top)} = \text{cond}^2(\mathbf{D})$  is  $O(\sqrt{\kappa})$  rather than  $O(\kappa)$ , matching the results in Wang et al. [2021] for HB and Liu et al. [2022] for NAG. Meanwhile, Corollary 1 has an additional dependence on  $\text{cond}(\mathbf{L})$ . Under Assumption 1,  $\text{cond}(\mathbf{L}) = O(\sqrt{\kappa})$  and hence the overall dependence is  $O(\kappa)$ . Although this is slower than NAG with initialization (13) or (14), it still outperforms GD with initialization (12), which has  $O(\kappa^2)$  dependence. Compared to previous results listed in Table 1, we only require the network width to be  $\Omega(r + \log \frac{1}{\delta})$  or  $\Omega(m + \log \frac{1}{\delta})$  depending on the initialization and there is no additional dependence on the input rank or condition number. When the data is low-rank, NAG with initialization (12) enables the sublinear-width (w.r.t. output dimension and sample size) network to converge linearly. It can be further accelerated if orthonormalization is adopted (13), which echoes the orthogonal initialization in Hu et al. [2020], Wang et al. [2021]. In the general case, our analysis still provides a tighter result, as (14) only requires the width to be  $\Omega(m + \log \frac{1}{\delta})$ .

## 5 Numerical Experiment

We validate our results via numerical experiments. For matrix factorization (1), we construct  $\mathbf{A} = \mathbf{U}\Sigma\mathbf{V}^\top \in \mathbb{R}^{100 \times 80}$ , where  $\Sigma \in \mathbb{R}^{5 \times 5}$  is diagonal with  $\sigma_1(\Sigma) = 1$  and  $\sigma_5(\Sigma) = 0.2$ , and  $\mathbf{U}$  and  $\mathbf{V}$  are orthonormal matrices. We set different levels of overparameterization ( $d \geq 5$ ) and initialize  $\mathbf{X}_0$  and  $\mathbf{Y}_0$  according to (2) with  $c = 50\sqrt{d}$ . For linear neural network (10), we construct the input data matrix  $\mathbf{D} = \mathbf{U}\Sigma\mathbf{V}^\top \in \mathbb{R}^{80 \times 120}$ , where  $\Sigma \in \mathbb{R}^{5 \times 5}$  is diagonal with  $\sigma_1(\Sigma) = 1$  and  $\sigma_5(\Sigma) = 0.5$ ,  $\mathbf{U}$  is orthonormal and  $\mathbf{V}$  is Gaussian. We use a Gaussian matrix  $\mathbf{A} \in \mathbb{R}^{100 \times 80}$  to construct the label matrix  $\mathbf{L} = \mathbf{A}\mathbf{D}$ . We keep  $c = 50\sqrt{d}$  and initialize  $\mathbf{X}_0$  and  $\mathbf{Y}_0$  according to (12). We run all experiments with 10 different initialization seeds and take the average.

We first compare GD and AltGD. For matrix factorization, We use the same initialization and the same step size  $\eta = 2/(L + \mu)$ , where  $L$  and  $\mu$  are computed as defined in Theorems 1 and 2. For linear neural networks,  $L$  and  $\mu$  are replaced by  $\tilde{L}$  and  $\tilde{\mu}$  in Theorem 3. As shown in Figure 1, they perform very similarly and the loss curves are overlapped. To better illustrate, we additionally use  $\eta = 1/L$  for GD, and it performs differently from GD/AltGD with  $\eta = 2/(L + \mu)$ .

We then compare GD and NAG. For matrix factorization, we use  $\eta = 2/(L + \mu)$  for GD and use  $\eta = 1/L$  and  $\beta = (\sqrt{L} - \sqrt{\mu})/(\sqrt{L} + \sqrt{\mu})$  for NAG, where  $L$  and  $\mu$  are computed as defined in Theorem 2. For linear neural networks, we replace  $L$  and  $\mu$  by  $\tilde{L}$  and  $\tilde{\mu}$  defined in Theorem 3. The results are shown in Figure 2. As illustrated, NAG exhibits much faster convergence than GD. Moreover, a higher overparameterization level helps accelerate convergence, as predicted by the prefactor  $O(\text{poly}(d(d - r + 1)^{-1}))$  in our iteration complexity.

To further illustrate the tightness of our theory, we compare our theoretical predictions with the actual loss in matrix factorization, as shown in Figure 3. We set  $c = 200\sqrt{d}$  and  $\sigma_5(\Sigma) \in \{0.1, 0.01\}$ , keeping other settings unchanged. The theoretical prediction at step  $t$  is computed as  $(1 - \mu/L)^{2t} \cdot f(\mathbf{X}_0, \mathbf{Y}_0)$  for GD and  $(1 - \sqrt{\mu}/(2\sqrt{L}))^{2t} \cdot f(\mathbf{X}_0, \mathbf{Y}_0)$  for NAG. We observe that the slope of the predicted loss closely matches the actual loss, supporting the tightness of our theory, especially for GD.

## 6 Conclusion and Future Work

We establish the convergence rate of GD and NAG for rectangular matrix factorization (1) under an unbalanced initialization and show the provable acceleration of NAG. We further extend our analysis to linear neural networks (10) and show the acceleration of NAG without excessive width requirements in previous work. Numerical experiments are provided to support our theory.

We believe our analysis can be extended to initialization where  $\mathbf{X}_0 \approx c\mathbf{A}\Phi$  and  $\mathbf{Y}_0 \approx 0$  rather than exactly equal. Relaxing the exact rank- $r$  condition to approximately rank- $r$  is also a possible generalization. The linear neural network model considered in this paper cannot fully capture the practical settings. We leave the extension to nonlinear activations for future work.

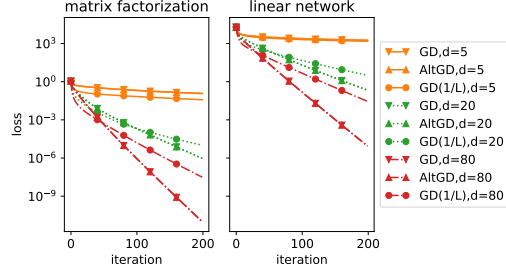

Figure 1: GD and AltGD achieve similar performance. The left plot is for (1), and the right plot is for (10).

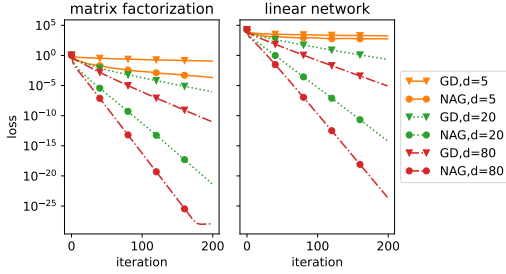

Figure 2: NAG converges faster than GD. The left plot is for (1), and the right plot is for (10).

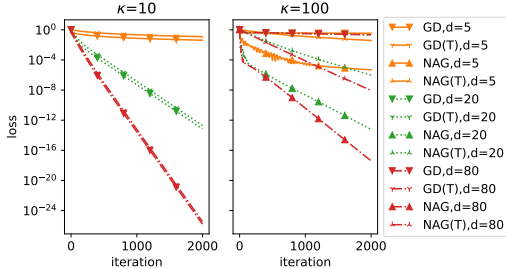

Figure 3: Comparison of predicted loss and numerical loss for matrix factorization. The left plot is for GD where  $\kappa = 10$ , and the right plot is for GD and NAG where  $\kappa = 100$ . (T) denotes theory prediction.

## References

- S. Bhojanapalli, A. Kyrillidis, and S. Sanghavi. Dropping convexity for faster semi-definite optimization. In *Conference on Learning Theory*, pages 530–582. PMLR, 2016.
- S. Du and W. Hu. Width provably matters in optimization for deep linear neural networks. In *International Conference on Machine Learning*, pages 1655–1664. PMLR, 2019.
- S. Du, W. Hu, and J. D. Lee. Algorithmic regularization in learning deep homogeneous models: Layers are automatically balanced. *Advances in Neural Information Processing Systems*, 31, 2018.
- N. Halko, P.-G. Martinsson, and J. A. Tropp. Finding structure with randomness: Probabilistic algorithms for constructing approximate matrix decompositions. *SIAM Review*, 53(2):217–288, 2011.
- R. A. Horn and C. R. Johnson. *Topics in matrix analysis*. Cambridge University Press, 1994.
- W. Hu, L. Xiao, and J. Pennington. Provable benefit of orthogonal initialization in optimizing deep linear networks. *International Conference on Learning Representations*, 2020.
- L. Jiang, Y. Chen, and L. Ding. Algorithmic regularization in model-free overparametrized asymmetric matrix factorization. *SIAM Journal on Mathematics of Data Science*, 5(3):723–744, 2023.
- Y. Li, T. Ma, and H. Zhang. Algorithmic regularization in over-parameterized matrix sensing and neural networks with quadratic activations. In *Conference on Learning Theory*, pages 2–47. PMLR, 2018.
- X. Liu, W. Tao, and Z. Pan. A convergence analysis of nesterov’s accelerated gradient method in training deep linear neural networks. *Information Sciences*, 612:898–925, 2022.
- S. Łojasiewicz. A topological property of real analytic subsets. *Coll. du CNRS, Les équations aux dérivées partielles*, 117(87-89):2, 1963.
- C. Ma, Y. Li, and Y. Chi. Beyond procrustes: Balancing-free gradient descent for asymmetric low-rank matrix sensing. *IEEE Transactions on Signal Processing*, 69:867–877, 2021.
- I. Necoara, Y. Nesterov, and F. Glineur. Linear convergence of first order methods for non-strongly convex optimization. *Mathematical Programming*, 175:69–107, 2019.
- A. S. Nemirovski and D. B. Yudin. *Problem complexity and method efficiency in optimization*. Wiley-Interscience, 1983.
- Y. Nesterov. *Introductory lectures on convex optimization: A basic course*, volume 87. Springer Science & Business Media, 2013.
- D. Park, A. Kyrillidis, C. Carmanis, and S. Sanghavi. Non-square matrix sensing without spurious local minima via the burer-monteiro approach. In *Artificial Intelligence and Statistics*, pages 65–74. PMLR, 2017.
- B. T. Polyak. Some methods of speeding up the convergence of iteration methods. *USSR Computational Mathematics and Mathematical Physics*, 4(5):1–17, 1964.
- M. Rudelson and R. Vershynin. Smallest singular value of a random rectangular matrix. *Communications on Pure and Applied Mathematics*, 62(12):1707–1739, 2009.
- D. Stöger and M. Soltanolkotabi. Small random initialization is akin to spectral learning: Optimization and generalization guarantees for overparameterized low-rank matrix reconstruction. *Advances in Neural Information Processing Systems*, 34:23831–23843, 2021.
- T. Tong, C. Ma, and Y. Chi. Accelerating ill-conditioned low-rank matrix estimation via scaled gradient descent. *Journal of Machine Learning Research*, 22(150):1–63, 2021a.
- T. Tong, C. Ma, and Y. Chi. Low-rank matrix recovery with scaled subgradient methods: Fast and robust convergence without the condition number. *IEEE Transactions on Signal Processing*, 69:2396–2409, 2021b.

400 S. Tu, R. Boczar, M. Simchowitz, M. Soltanolkotabi, and B. Recht. Low-rank solutions of linear  
 401 matrix equations via procrustes flow. In *International Conference on Machine Learning*, pages  
 402 964–973. PMLR, 2016.

403 R. Vershynin. Introduction to the non-asymptotic analysis of random matrices. *arXiv preprint*  
 404 *arXiv:1011.3027*, 2010.

405 J.-K. Wang, C.-H. Lin, and J. D. Abernethy. A modular analysis of provable acceleration via polyak’s  
 406 momentum: Training a wide relu network and a deep linear network. In *International Conference*  
 407 *on Machine Learning*, pages 10816–10827. PMLR, 2021.

408 Y. Wang, M. Chen, T. Zhao, and M. Tao. Large learning rate tames homogeneity: Convergence and  
 409 balancing effect. *International Conference on Learning Representations*, 2022.

410 Y. Wang, Z. Xu, T. Zhao, and M. Tao. Good regularity creates large learning rate implicit biases:  
 411 edge of stability, balancing, and catapult. *arXiv preprint arXiv:2310.17087*, 2023.

412 R. Ward and T. Kolda. Convergence of alternating gradient descent for matrix factorization. *Advances*  
 413 *in Neural Information Processing Systems*, 36:22369–22382, 2023.

414 X. Xu, Y. Shen, Y. Chi, and C. Ma. The power of preconditioning in overparameterized low-rank  
 415 matrix sensing. In *International Conference on Machine Learning*, pages 38611–38654. PMLR,  
 416 2023.

417 T. Ye and S. S. Du. Global convergence of gradient descent for asymmetric low-rank matrix  
 418 factorization. *Advances in Neural Information Processing Systems*, 34:1429–1439, 2021.

419 P. Yue, C. Fang, and Z. Lin. On the lower bound of minimizing polyak-łojasiewicz functions. In  
 420 *Conference on Learning Theory*, pages 2948–2968. PMLR, 2023.

421 G. Zhang, S. Fattahi, and R. Y. Zhang. Preconditioned gradient descent for overparameterized  
 422 nonconvex burer–monteiro factorization with global optimality certification. *Journal of Machine*  
 423 *Learning Research*, 24(163):1–55, 2023.

424 D. Zhou, Y. Cao, and Q. Gu. Accelerated factored gradient descent for low-rank matrix factorization.  
 425 In *International Conference on Artificial Intelligence and Statistics*, pages 4430–4440. PMLR,  
 426 2020.

## 427 NeurIPS Paper Checklist

428 The checklist is designed to encourage best practices for responsible machine learning research,  
 429 addressing issues of reproducibility, transparency, research ethics, and societal impact. Do not remove  
 430 the checklist: **The papers not including the checklist will be desk rejected.** The checklist should  
 431 follow the references and precede the (optional) supplemental material. The checklist does NOT  
 432 count towards the page limit.

433 Please read the checklist guidelines carefully for information on how to answer these questions. For  
 434 each question in the checklist:

- 435 • You should answer [Yes], [No], or [NA].
- 436 • [NA] means either that the question is Not Applicable for that particular paper or the
- 437 relevant information is Not Available.
- 438 • Please provide a short (1–2 sentence) justification right after your answer (even for NA).

439 **The checklist answers are an integral part of your paper submission.** They are visible to the  
 440 reviewers, area chairs, senior area chairs, and ethics reviewers. You will be asked to also include it  
 441 (after eventual revisions) with the final version of your paper, and its final version will be published  
 442 with the paper.

443 The reviewers of your paper will be asked to use the checklist as one of the factors in their evaluation.  
 444 While "[Yes]" is generally preferable to "[No]", it is perfectly acceptable to answer "[No]" provided a  
 445 proper justification is given (e.g., "error bars are not reported because it would be too computationally  
 446 expensive" or "we were unable to find the license for the dataset we used"). In general, answering

"[No]" or "[NA]" is not grounds for rejection. While the questions are phrased in a binary way, we acknowledge that the true answer is often more nuanced, so please just use your best judgment and write a justification to elaborate. All supporting evidence can appear either in the main paper or the supplemental material, provided in appendix. If you answer [Yes] to a question, in the justification please point to the section(s) where related material for the question can be found.

IMPORTANT, please:

- **Delete this instruction block, but keep the section heading "NeurIPS paper checklist",**
- **Keep the checklist subsection headings, questions/answers and guidelines below.**
- **Do not modify the questions and only use the provided macros for your answers.**

## 1. Claims

Question: Do the main claims made in the abstract and introduction accurately reflect the paper's contributions and scope?

Answer: [Yes]

Justification: The main claims made in the abstract and introduction (Section 1) accurately reflect the paper's contributions and scope.

Guidelines:

- The answer NA means that the abstract and introduction do not include the claims made in the paper.
- The abstract and/or introduction should clearly state the claims made, including the contributions made in the paper and important assumptions and limitations. A No or NA answer to this question will not be perceived well by the reviewers.
- The claims made should match theoretical and experimental results, and reflect how much the results can be expected to generalize to other settings.
- It is fine to include aspirational goals as motivation as long as it is clear that these goals are not attained by the paper.

## 2. Limitations

Question: Does the paper discuss the limitations of the work performed by the authors?

Answer: [Yes]

Justification: We state all settings and assumptions required for our results and discuss limitations (e.g. exact rank- $r$   $\mathbf{A}$ ,  $\mathbf{Y}_0 = 0$ , etc.) in Sections 1, 2, 4 and 6.

Guidelines:

- The answer NA means that the paper has no limitation while the answer No means that the paper has limitations, but those are not discussed in the paper.
- The authors are encouraged to create a separate "Limitations" section in their paper.
- The paper should point out any strong assumptions and how robust the results are to violations of these assumptions (e.g., independence assumptions, noiseless settings, model well-specification, asymptotic approximations only holding locally). The authors should reflect on how these assumptions might be violated in practice and what the implications would be.
- The authors should reflect on the scope of the claims made, e.g., if the approach was only tested on a few datasets or with a few runs. In general, empirical results often depend on implicit assumptions, which should be articulated.
- The authors should reflect on the factors that influence the performance of the approach. For example, a facial recognition algorithm may perform poorly when image resolution is low or images are taken in low lighting. Or a speech-to-text system might not be used reliably to provide closed captions for online lectures because it fails to handle technical jargon.
- The authors should discuss the computational efficiency of the proposed algorithms and how they scale with dataset size.
- If applicable, the authors should discuss possible limitations of their approach to address problems of privacy and fairness.

- While the authors might fear that complete honesty about limitations might be used by reviewers as grounds for rejection, a worse outcome might be that reviewers discover limitations that aren't acknowledged in the paper. The authors should use their best judgment and recognize that individual actions in favor of transparency play an important role in developing norms that preserve the integrity of the community. Reviewers will be specifically instructed to not penalize honesty concerning limitations.

### 3. Theory Assumptions and Proofs

Question: For each theoretical result, does the paper provide the full set of assumptions and a complete (and correct) proof?

Answer: [\[Yes\]](#)

Justification: We clearly state all sets of assumptions (Sections 1, 2 and 4) and proof sketches in the main part of the paper (Section 3), and provide complete and verified proof in the appendix (Appendix A to D). Theorems and Lemmas are properly referenced.

Guidelines:

- The answer NA means that the paper does not include theoretical results.
- All the theorems, formulas, and proofs in the paper should be numbered and cross-referenced.
- All assumptions should be clearly stated or referenced in the statement of any theorems.
- The proofs can either appear in the main paper or the supplemental material, but if they appear in the supplemental material, the authors are encouraged to provide a short proof sketch to provide intuition.
- Inversely, any informal proof provided in the core of the paper should be complemented by formal proofs provided in appendix or supplemental material.
- Theorems and Lemmas that the proof relies upon should be properly referenced.

### 4. Experimental Result Reproducibility

Question: Does the paper fully disclose all the information needed to reproduce the main experimental results of the paper to the extent that it affects the main claims and/or conclusions of the paper (regardless of whether the code and data are provided or not)?

Answer: [\[Yes\]](#)

Justification: We state all main configurations of our experiments in Section 5 that allows one to reproduce our results.

Guidelines:

- The answer NA means that the paper does not include experiments.
- If the paper includes experiments, a No answer to this question will not be perceived well by the reviewers: Making the paper reproducible is important, regardless of whether the code and data are provided or not.
- If the contribution is a dataset and/or model, the authors should describe the steps taken to make their results reproducible or verifiable.
- Depending on the contribution, reproducibility can be accomplished in various ways. For example, if the contribution is a novel architecture, describing the architecture fully might suffice, or if the contribution is a specific model and empirical evaluation, it may be necessary to either make it possible for others to replicate the model with the same dataset, or provide access to the model. In general, releasing code and data is often one good way to accomplish this, but reproducibility can also be provided via detailed instructions for how to replicate the results, access to a hosted model (e.g., in the case of a large language model), releasing of a model checkpoint, or other means that are appropriate to the research performed.
- While NeurIPS does not require releasing code, the conference does require all submissions to provide some reasonable avenue for reproducibility, which may depend on the nature of the contribution. For example
  - (a) If the contribution is primarily a new algorithm, the paper should make it clear how to reproduce that algorithm.
  - (b) If the contribution is primarily a new model architecture, the paper should describe the architecture clearly and fully.

- (c) If the contribution is a new model (e.g., a large language model), then there should either be a way to access this model for reproducing the results or a way to reproduce the model (e.g., with an open-source dataset or instructions for how to construct the dataset).
- (d) We recognize that reproducibility may be tricky in some cases, in which case authors are welcome to describe the particular way they provide for reproducibility. In the case of closed-source models, it may be that access to the model is limited in some way (e.g., to registered users), but it should be possible for other researchers to have some path to reproducing or verifying the results.

## 5. Open access to data and code

Question: Does the paper provide open access to the data and code, with sufficient instructions to faithfully reproduce the main experimental results, as described in supplemental material?

Answer: [Yes]

Justification: We provide anonymized code in the zip file for experiments in Section 5 as supplement materials.

Guidelines:

- The answer NA means that paper does not include experiments requiring code.
- Please see the NeurIPS code and data submission guidelines (<https://nips.cc/public/guides/CodeSubmissionPolicy>) for more details.
- While we encourage the release of code and data, we understand that this might not be possible, so “No” is an acceptable answer. Papers cannot be rejected simply for not including code, unless this is central to the contribution (e.g., for a new open-source benchmark).
- The instructions should contain the exact command and environment needed to run to reproduce the results. See the NeurIPS code and data submission guidelines (<https://nips.cc/public/guides/CodeSubmissionPolicy>) for more details.
- The authors should provide instructions on data access and preparation, including how to access the raw data, preprocessed data, intermediate data, and generated data, etc.
- The authors should provide scripts to reproduce all experimental results for the new proposed method and baselines. If only a subset of experiments are reproducible, they should state which ones are omitted from the script and why.
- At submission time, to preserve anonymity, the authors should release anonymized versions (if applicable).
- Providing as much information as possible in supplemental material (appended to the paper) is recommended, but including URLs to data and code is permitted.

## 6. Experimental Setting/Details

Question: Does the paper specify all the training and test details (e.g., data splits, hyperparameters, how they were chosen, type of optimizer, etc.) necessary to understand the results?

Answer: [Yes]

Justification: We specify all important experiment details in Section 5.

Guidelines:

- The answer NA means that the paper does not include experiments.
- The experimental setting should be presented in the core of the paper to a level of detail that is necessary to appreciate the results and make sense of them.
- The full details can be provided either with the code, in appendix, or as supplemental material.

## 7. Experiment Statistical Significance

Question: Does the paper report error bars suitably and correctly defined or other appropriate information about the statistical significance of the experiments?

Answer: [No]

Justification: Our experiments do not require error bars.

Guidelines:

- The answer NA means that the paper does not include experiments.
- The authors should answer "Yes" if the results are accompanied by error bars, confidence intervals, or statistical significance tests, at least for the experiments that support the main claims of the paper.
- The factors of variability that the error bars are capturing should be clearly stated (for example, train/test split, initialization, random drawing of some parameter, or overall run with given experimental conditions).
- The method for calculating the error bars should be explained (closed form formula, call to a library function, bootstrap, etc.)
- The assumptions made should be given (e.g., Normally distributed errors).
- It should be clear whether the error bar is the standard deviation or the standard error of the mean.
- It is OK to report 1-sigma error bars, but one should state it. The authors should preferably report a 2-sigma error bar than state that they have a 96% CI, if the hypothesis of Normality of errors is not verified.
- For asymmetric distributions, the authors should be careful not to show in tables or figures symmetric error bars that would yield results that are out of range (e.g. negative error rates).
- If error bars are reported in tables or plots, The authors should explain in the text how they were calculated and reference the corresponding figures or tables in the text.

## 8. Experiments Compute Resources

Question: For each experiment, does the paper provide sufficient information on the computer resources (type of compute workers, memory, time of execution) needed to reproduce the experiments?

Answer: [No]

Justification: Our experiments have no special requirements on compute resources.

Guidelines:

- The answer NA means that the paper does not include experiments.
- The paper should indicate the type of compute workers CPU or GPU, internal cluster, or cloud provider, including relevant memory and storage.
- The paper should provide the amount of compute required for each of the individual experimental runs as well as estimate the total compute.
- The paper should disclose whether the full research project required more compute than the experiments reported in the paper (e.g., preliminary or failed experiments that didn't make it into the paper).

## 9. Code Of Ethics

Question: Does the research conducted in the paper conform, in every respect, with the NeurIPS Code of Ethics <https://neurips.cc/public/EthicsGuidelines?>

Answer: [Yes]

Justification: The research conducted in the paper conform with the NeurIPS Code of Ethics.

Guidelines:

- The answer NA means that the authors have not reviewed the NeurIPS Code of Ethics.
- If the authors answer No, they should explain the special circumstances that require a deviation from the Code of Ethics.
- The authors should make sure to preserve anonymity (e.g., if there is a special consideration due to laws or regulations in their jurisdiction).

## 10. Broader Impacts

Question: Does the paper discuss both potential positive societal impacts and negative societal impacts of the work performed?

Answer: [NA]

Justification: There is no societal impact of the work performed.

Guidelines:

- The answer NA means that there is no societal impact of the work performed.
- If the authors answer NA or No, they should explain why their work has no societal impact or why the paper does not address societal impact.
- Examples of negative societal impacts include potential malicious or unintended uses (e.g., disinformation, generating fake profiles, surveillance), fairness considerations (e.g., deployment of technologies that could make decisions that unfairly impact specific groups), privacy considerations, and security considerations.
- The conference expects that many papers will be foundational research and not tied to particular applications, let alone deployments. However, if there is a direct path to any negative applications, the authors should point it out. For example, it is legitimate to point out that an improvement in the quality of generative models could be used to generate deepfakes for disinformation. On the other hand, it is not needed to point out that a generic algorithm for optimizing neural networks could enable people to train models that generate Deepfakes faster.
- The authors should consider possible harms that could arise when the technology is being used as intended and functioning correctly, harms that could arise when the technology is being used as intended but gives incorrect results, and harms following from (intentional or unintentional) misuse of the technology.
- If there are negative societal impacts, the authors could also discuss possible mitigation strategies (e.g., gated release of models, providing defenses in addition to attacks, mechanisms for monitoring misuse, mechanisms to monitor how a system learns from feedback over time, improving the efficiency and accessibility of ML).

## 11. Safeguards

Question: Does the paper describe safeguards that have been put in place for responsible release of data or models that have a high risk for misuse (e.g., pretrained language models, image generators, or scraped datasets)?

Answer: [NA]

Justification: The paper poses no such risks.

Guidelines:

- The answer NA means that the paper poses no such risks.
- Released models that have a high risk for misuse or dual-use should be released with necessary safeguards to allow for controlled use of the model, for example by requiring that users adhere to usage guidelines or restrictions to access the model or implementing safety filters.
- Datasets that have been scraped from the Internet could pose safety risks. The authors should describe how they avoided releasing unsafe images.
- We recognize that providing effective safeguards is challenging, and many papers do not require this, but we encourage authors to take this into account and make a best faith effort.

## 12. Licenses for existing assets

Question: Are the creators or original owners of assets (e.g., code, data, models), used in the paper, properly credited and are the license and terms of use explicitly mentioned and properly respected?

Answer: [NA]

Justification: The paper does not use existing assets.

Guidelines:

- The answer NA means that the paper does not use existing assets.
- The authors should cite the original paper that produced the code package or dataset.
- The authors should state which version of the asset is used and, if possible, include a URL.

- The name of the license (e.g., CC-BY 4.0) should be included for each asset.
- For scraped data from a particular source (e.g., website), the copyright and terms of service of that source should be provided.
- If assets are released, the license, copyright information, and terms of use in the package should be provided. For popular datasets, [paperswithcode.com/datasets](https://paperswithcode.com/datasets) has curated licenses for some datasets. Their licensing guide can help determine the license of a dataset.
- For existing datasets that are re-packaged, both the original license and the license of the derived asset (if it has changed) should be provided.
- If this information is not available online, the authors are encouraged to reach out to the asset's creators.

### 13. New Assets

Question: Are new assets introduced in the paper well documented and is the documentation provided alongside the assets?

Answer: [NA]

Justification: The paper does not release new assets.

Guidelines:

- The answer NA means that the paper does not release new assets.
- Researchers should communicate the details of the dataset/code/model as part of their submissions via structured templates. This includes details about training, license, limitations, etc.
- The paper should discuss whether and how consent was obtained from people whose asset is used.
- At submission time, remember to anonymize your assets (if applicable). You can either create an anonymized URL or include an anonymized zip file.

### 14. Crowdsourcing and Research with Human Subjects

Question: For crowdsourcing experiments and research with human subjects, does the paper include the full text of instructions given to participants and screenshots, if applicable, as well as details about compensation (if any)?

Answer: [NA]

Justification: The paper does not involve crowdsourcing nor research with human subjects.

Guidelines:

- The answer NA means that the paper does not involve crowdsourcing nor research with human subjects.
- Including this information in the supplemental material is fine, but if the main contribution of the paper involves human subjects, then as much detail as possible should be included in the main paper.
- According to the NeurIPS Code of Ethics, workers involved in data collection, curation, or other labor should be paid at least the minimum wage in the country of the data collector.

### 15. Institutional Review Board (IRB) Approvals or Equivalent for Research with Human Subjects

Question: Does the paper describe potential risks incurred by study participants, whether such risks were disclosed to the subjects, and whether Institutional Review Board (IRB) approvals (or an equivalent approval/review based on the requirements of your country or institution) were obtained?

Answer: [NA]

Justification: The paper does not involve crowdsourcing nor research with human subjects.

Guidelines:

- The answer NA means that the paper does not involve crowdsourcing nor research with human subjects.

- Depending on the country in which research is conducted, IRB approval (or equivalent) may be required for any human subjects research. If you obtained IRB approval, you should clearly state this in the paper.
- We recognize that the procedures for this may vary significantly between institutions and locations, and we expect authors to adhere to the NeurIPS Code of Ethics and the guidelines for their institution.
- For initial submissions, do not include any information that would break anonymity (if applicable), such as the institution conducting the review.

## A Singular Value Bounds

### A.1 Singular Value Bounds for Random Matrix

**Proposition 4** (Rudelson and Vershynin [2009]). *Let  $\mathbf{A}$  be an  $N \times n$  random matrix,  $N \geq n$ , whose elements are i.i.d. zero mean sub-Gaussian random variables with unit variance. Then for  $\tau \geq 0$ , we have*

$$\mathbb{P}(\sigma_n(\mathbf{A}) \leq \tau(\sqrt{N} - \sqrt{n-1})) \leq (c_1\tau)^{N-n+1} + e^{-c_2N}$$

where  $c_1, c_2 > 0$  depend (polynomially) only on the sub-Gaussian moment.

**Proposition 5** (Vershynin [2010]). *Let  $\mathbf{A}$  be an  $N \times n$  random matrix,  $N \geq n$ , whose elements are i.i.d. zero mean Gaussian random variables with unit variance. Then for  $t \geq 0$ , we have*

$$\mathbb{P}(\sigma_1(\mathbf{A}) \geq \sqrt{N} + \sqrt{n} + t) \leq e^{-\frac{t^2}{2}}.$$

### A.2 Proof of Proposition 1

*Proof of Proposition 1.* Singular value decompose  $\mathbf{A}$  as  $\mathbf{A} = \mathbf{U}\mathbf{\Sigma}\mathbf{V}^\top$ , then  $\mathbf{X}_0 = c\mathbf{U}\mathbf{\Sigma}\mathbf{V}^\top\mathbf{\Phi}$ . Since  $\mathbf{V}^\top\mathbf{V} = \mathbf{I}_r$ , the columns of  $\mathbf{V}^\top\mathbf{\Phi} \in \mathbb{R}^{r \times d}$  are independent Gaussian vectors with distribution  $\mathcal{N}(0, \frac{1}{d}\mathbf{V}^\top\mathbf{V}) = \mathcal{N}(0, \frac{1}{d}\mathbf{I}_r)$ . By Proposition 4 in Appendix A, we have

$$\mathbb{P}\left(\sigma_r(\mathbf{V}^\top\mathbf{\Phi}) \leq \tau\left(1 - \frac{\sqrt{r-1}}{\sqrt{d}}\right)\right) \leq e^{-(d-r+1)\log \frac{1}{c_1\tau}} + e^{-c_2d}$$

for some universal constants  $c_1$  and  $c_2$  and any  $\tau \geq 0$ . On the other hand, by Proposition 5 in Appendix A, we have

$$\mathbb{P}\left(\sigma_1(\mathbf{V}^\top\mathbf{\Phi}) \geq \frac{\sqrt{d} + \sqrt{r} + \sqrt{s}}{\sqrt{d}}\right) \leq e^{-\frac{s}{2}}.$$

Plugging in  $s = d$  and applying the union bound yield

$$\mathbb{P}\left(\frac{\tau(\sqrt{d} - \sqrt{r-1})}{\sqrt{d}} \leq \sigma_r(\mathbf{V}^\top\mathbf{\Phi}) \leq \sigma_1(\mathbf{V}^\top\mathbf{\Phi}) \leq \frac{2\sqrt{d} + \sqrt{r}}{\sqrt{d}}\right) \geq 1 - \delta,$$

where  $\delta = 3e^{-\min\{(d-r+1)\log \frac{1}{c_1\tau}, c_2d, \frac{d}{2}\}}$ . The proposition follows immediately from the fact that

$$c \cdot \sigma_r(\mathbf{V}^\top\mathbf{\Phi})\sigma_r(\mathbf{A}) \leq \sigma_r(\mathbf{X}_0) \leq \sigma_1(\mathbf{X}_0) \leq c \cdot \sigma_1(\mathbf{V}^\top\mathbf{\Phi})\sigma_1(\mathbf{A}).$$

□

## B Missing Proofs for GD

### B.1 Auxiliary Lemma

**Lemma 6.** *Suppose  $\{a_t\}_{t \geq 0}$  and  $\{b_t\}_{t \geq 0}$  are two non-negative sequences satisfying*

$$a_{t+1} \leq \rho \cdot a_t + b_t, \quad b_t \leq \theta^t \cdot c_0,$$

where  $0 \leq \rho < \theta < 1$ ,  $c_0 \geq 0$ , then the following holds for all  $t \geq 0$ :

$$a_t \leq \theta^t \cdot \left(a_0 + \frac{c_0}{\theta - \rho}\right).$$

788 *Proof.* The inequality holds trivially for  $t = 0$ . For  $t \geq 0$ , we have

$$\begin{aligned} a_{t+1} &= \rho^{t+1} \cdot a_0 + \sum_{s=0}^t \rho^{t-s} \theta^s \cdot c_0 \\ &= \rho^{t+1} \cdot a_0 + \frac{\theta^{t+1} - \rho^{t+1}}{\theta - \rho} \cdot c_0 \\ &= \theta^{t+1} \cdot \left( a_0 + \frac{1}{\theta - \rho} \cdot c_0 \right). \end{aligned}$$

789

□

## 790 B.2 Proof of Proposition 2

791 *Proof of Proposition 2.* According to (3), we have

$$\begin{aligned} \mathbf{R}_{t+1} &= \mathbf{X}_{t+1} \mathbf{Y}_{t+1}^\top - \mathbf{A} \\ &= (\mathbf{X}_t + \mathbf{P}_t)(\mathbf{Y}_t + \mathbf{Q}_t)^\top - \mathbf{A} \\ &= \mathbf{R}_t - \eta (\mathbf{R}_t \mathbf{Y}_t \mathbf{Y}_t^\top + \mathbf{X}_t \mathbf{X}_t^\top \mathbf{R}_t) + \mathbf{P}_t \mathbf{Q}_t^\top. \end{aligned}$$

792 Applying vectorization on both sides yields

$$\begin{aligned} \mathbf{r}_{t+1} &= \mathbf{r}_t - \eta \mathbf{H}_t \mathbf{r}_t + \beta (\mathbf{r}_t - \mathbf{r}_{t-1}) + \text{vec}(\mathbf{P}_t \mathbf{Q}_t^\top) \\ &= (\mathbf{I}_{mn} - \eta \mathbf{H}_t) \mathbf{r}_t + \text{vec}(\mathbf{P}_t \mathbf{Q}_t^\top). \end{aligned}$$

793 Hence we have the result.

□

## 794 B.3 Proof of Lemma 1

795 *Proof of Lemma 1.* By Proposition 1, the symmetric matrix  $\mathbf{H}_0 = \mathbf{I}_n \otimes (\mathbf{X}_0 \mathbf{X}_0^\top)$  has  $nr$  positive eigenvalues, and the eigensubspace of these positive eigenvalues is

$$\mathcal{H} = \prod_{i=1}^n \text{col}(\mathbf{X}_0) = \prod_{i=1}^n \text{col}(\mathbf{A}).$$

797 According to the GD update (3),

$$\text{col}(\mathbf{X}_{t+1}) \subseteq \text{col}(\mathbf{X}_t) + \text{col}(\mathbf{X}_t \mathbf{Y}_t^\top \mathbf{Y}_t) + \text{col}(\mathbf{A} \mathbf{Y}_t) \subseteq \text{col}(\mathbf{X}_t) + \text{col}(\mathbf{A}),$$

798 hence by induction we conclude  $\text{col}(\mathbf{X}_t) \subseteq \text{col}(\mathbf{A})$  for all  $t \geq 0$ . As a result, we have

$$\mathbf{r}_t = \text{vec}(\mathbf{X}_t \mathbf{Y}_t^\top - \mathbf{A}) \in \mathcal{H}.$$

799 For  $\xi_t$ , notice that

$$\text{col}(\mathbf{R}_t \mathbf{Y}_t \mathbf{Y}_t^\top + \mathbf{X}_t \mathbf{X}_t^\top \mathbf{R}_t) \subseteq \text{col}(\mathbf{R}_t) + \text{col}(\mathbf{X}_t) \subseteq \text{col}(\mathbf{A})$$

800 and

$$\text{col}(\mathbf{P}_t \mathbf{Q}_t^\top) = \text{col}((\mathbf{X}_{t+1} - \mathbf{X}_t)(\mathbf{Y}_{t+1} - \mathbf{Y}_t)^\top) \subseteq \text{col}(\mathbf{X}_{t+1}) + \text{col}(\mathbf{X}_t) \subseteq \text{col}(\mathbf{A}),$$

801 thus we have

$$\xi_t = \eta \cdot \text{vec}(\mathbf{R}_t \mathbf{Y}_0 \mathbf{Y}_0^\top + \mathbf{X}_0 \mathbf{X}_0^\top \mathbf{R}_t - \mathbf{R}_t \mathbf{Y}_t \mathbf{Y}_t^\top - \mathbf{X}_t \mathbf{X}_t^\top \mathbf{R}_t) + \text{vec}(\mathbf{P}_t \mathbf{Q}_t^\top) \in \mathcal{H}.$$

802

□

## 803 B.4 Proof of Lemma 2

804 *Proof of Lemma 2.* Since  $\mathbf{I}_{mn}$  commutes with symmetric matrix  $\mathbf{H}_0$ , we can simultaneously diagonalize the two matrices and get

$$\lambda_i(\mathbf{T}_{\text{GD}}) = 1 - \eta \lambda_{mn-i}(\mathbf{H}_0), \quad \forall i = 1, 2, \dots, mn.$$

When  $\eta \in (0, \frac{2}{L})$ ,  $\lambda_i(\mathbf{T}_{\text{GD}}) = 1$  for  $i = 1, 2, \dots, (m-r)n$ . Let  $\{\mathbf{v}_i\}_{i=1}^{mn}$  be orthonormal eigenvectors,  $\mathbf{v}_i$  corresponds to  $\lambda_i(\mathbf{T}_{\text{GD}})$ . Then we have

$$\begin{aligned}\|\mathbf{T}_{\text{GD}}\mathbf{v}\| &= \left\| \mathbf{T}_{\text{GD}} \left( \sum_{i=1}^{mn} \langle \mathbf{v}, \mathbf{v}_i \rangle \mathbf{v}_i \right) \right\| \\ &= \sqrt{\sum_{i=(m-r)n+1}^{mn} \langle \mathbf{v}, \mathbf{v}_i \rangle^2 \lambda_i^2(\mathbf{T}_{\text{GD}})} \\ &\leq \max_{(m-r)n+1 \leq i \leq mn} |\lambda_i(\mathbf{T}_{\text{GD}})| \|\mathbf{v}\| \\ &= \max\{|1 - \eta L|, |1 - \eta \mu|\} \|\mathbf{v}\|.\end{aligned}$$

Plugging in the step size yields the second result.  $\square$

### B.5 Proof of Lemma 3

*Proof of Lemma 3.* For all  $s \leq t$ , by assumption we have

$$\begin{aligned}\|\mathbf{P}_s\|_{\text{F}} &= \eta \|\mathbf{R}_s \mathbf{Y}_s\|_{\text{F}} \\ &\leq \eta \|\mathbf{Y}_s\| \|\mathbf{R}_s\|_{\text{F}} \\ &\leq \eta (\|\mathbf{Y}_0\| + \|\mathbf{Y}_s - \mathbf{Y}_0\|) \|\mathbf{R}_s\|_{\text{F}} \\ &\leq \eta (\|\mathbf{Y}_0\| + \|\mathbf{Y}_s - \mathbf{Y}_0\|_{\text{F}}) \|\mathbf{R}_s\|_{\text{F}} \\ &\leq \eta (\|\mathbf{Y}_0\| + C_2) \|\mathbf{R}_s\|_{\text{F}} \\ &\leq \eta (\|\mathbf{Y}_0\| + C_2) C_1 \theta^s \|\mathbf{r}_0\|.\end{aligned}$$

Similarly, we have

$$\|\mathbf{Q}_s\|_{\text{F}} \leq \eta (\|\mathbf{X}_0\| + C_2) C_1 \theta^s \|\mathbf{r}_0\|.$$

Combining the two bounds yields

$$\|\text{vec}(\mathbf{P}_s \mathbf{Q}_s^{\top})\| = \|\mathbf{P}_s \mathbf{Q}_s^{\top}\|_{\text{F}} \leq \|\mathbf{P}_s\|_{\text{F}} \|\mathbf{Q}_s\|_{\text{F}} \leq C_3 \theta^{2t} \|\mathbf{r}_0\|^2,$$

where  $C_3 = \eta^2 C_1^2 (\|\mathbf{X}_0\| + C_2) (\|\mathbf{Y}_0\| + C_2)$ .

For the second part, we have

$$\begin{aligned}\|(\mathbf{H}_0 - \mathbf{H}_s) \mathbf{r}_s\| &= \|\mathbf{R}_s (\mathbf{Y}_0 \mathbf{Y}_0^{\top} - \mathbf{Y}_s \mathbf{Y}_s^{\top}) + (\mathbf{X}_0 \mathbf{X}_0^{\top} - \mathbf{X}_s \mathbf{X}_s^{\top}) \mathbf{R}_s\|_{\text{F}} \\ &\leq \|\mathbf{R}_s (\mathbf{Y}_0 \mathbf{Y}_0^{\top} - \mathbf{Y}_s \mathbf{Y}_s^{\top})\|_{\text{F}} + \|(\mathbf{X}_0 \mathbf{X}_0^{\top} - \mathbf{X}_s \mathbf{X}_s^{\top}) \mathbf{R}_s\|_{\text{F}} \\ &\leq \|\mathbf{Y}_0 \mathbf{Y}_0^{\top} - \mathbf{Y}_s \mathbf{Y}_s^{\top}\| \|\mathbf{R}_s\|_{\text{F}} + \|\mathbf{X}_0 \mathbf{X}_0^{\top} - \mathbf{X}_s \mathbf{X}_s^{\top}\| \|\mathbf{R}_s\|_{\text{F}} \\ &\leq (2 \|\mathbf{Y}_0\| + \|\mathbf{Y}_s - \mathbf{Y}_0\|_{\text{F}}) \|\mathbf{Y}_s - \mathbf{Y}_0\|_{\text{F}} \|\mathbf{R}_s\|_{\text{F}} \\ &\quad + (2 \|\mathbf{X}_0\| + \|\mathbf{X}_s - \mathbf{X}_0\|_{\text{F}}) \|\mathbf{X}_s - \mathbf{X}_0\|_{\text{F}} \|\mathbf{R}_s\|_{\text{F}} \\ &\leq 2(\|\mathbf{X}_0\| + \|\mathbf{Y}_0\| + C_2) C_2 \|\mathbf{R}_s\|_{\text{F}} \\ &\leq C_4 \theta^s \|\mathbf{r}_0\|,\end{aligned}$$

where  $C_4 = 2\eta (\|\mathbf{X}_0\| + \|\mathbf{Y}_0\| + C_2) C_1 C_2$ .

Finally, when (6) holds, we have

$$\|\mathbf{X}_{t+1} - \mathbf{X}_0\|_{\text{F}} \leq \sum_{s=0}^t \|\mathbf{P}_s\|_{\text{F}} \leq \frac{\eta (\|\mathbf{Y}_0\| + C_2) C_1}{1 - \theta} \|\mathbf{r}_0\| \leq C_2.$$

Similarly, we have  $\|\mathbf{Y}_{t+1} - \mathbf{Y}_0\|_{\text{F}} \leq C_2$ .  $\square$

### B.6 Proof of Theorem 1

*Proof of Theorem 1.* Let  $C_1$  to  $C_4$  be constants defined in Lemma 3. Define  $\rho = \frac{L-\mu}{L+\mu}$ ,  $\theta = 1 - \frac{\mu}{L}$ ,

$a_t = C_1 \|\mathbf{r}_t\|$ , and  $b_t = C_1 \|\xi_t\|$  for  $t \geq 0$ . By Proposition 2 and lemmas 1 and 2 we have

$$a_{t+1} \leq \rho \cdot a_t + b_t$$

for all  $t \geq 0$ . It remains to show that  $b_t \leq \theta^t \cdot c_0$ . By initialization (2),  $a_0 = C_1 \|\mathbf{r}_0\| = C_1 \|\mathbf{A}\|_F$ ,  
 $b_0 = 0$ . Let  $C_1 = \frac{\mu(L+\mu)p}{2\|\mathbf{A}\|_F L(1+p)}$  and  $C_2 = p\sqrt{L}$  where  $p = \frac{\mu(L-\mu)}{24L^2} \in (0, 1)$ . Plugging  $\eta = \frac{2}{L+\mu}$ ,  
 $\|\mathbf{X}_0\| = \sqrt{L}$  and  $\|\mathbf{Y}_0\| = 0$  into  $C_3$  and  $C_4$  yields

$$C_3 = \frac{\mu^2 p^3}{\|\mathbf{A}\|_F^2 L(1+p)}, \quad C_4 = \frac{2\mu p^2}{\|\mathbf{A}\|_F}.$$

Let

$$c_0 = C_1(C_3 \|\mathbf{r}_0\| + C_4) \|\mathbf{r}_0\|,$$

then we can show the following relations:

$$a_0 + \frac{c_0}{\theta - \rho} \leq C_1^2 \|\mathbf{A}\|_F, \quad C_1 \geq 1. \quad (15)$$

Indeed, by Proposition 1, with probability at least  $1 - \delta$ , our choice of  $c$  guarantees

$$\mu \geq \frac{144 \text{cond}^4(\mathbf{X}_0) \|\mathbf{A}\|_F}{(\text{cond}^2(\mathbf{X}_0) - 1)} = \frac{144L^2 \|\mathbf{A}\|_F}{\mu(L - \mu)}. \quad (16)$$

Our goal is to show

$$a_0 + \frac{c_0}{\theta - \rho} = C_1 \|\mathbf{A}\|_F + C_1(C_3 \|\mathbf{A}\|_F + C_4) \|\mathbf{A}\|_F \cdot \frac{L(L + \mu)}{\mu(L - \mu)} \leq C_1^2 \|\mathbf{A}\|_F,$$

which is equivalent to

$$\|\mathbf{A}\|_F + \left( \frac{\mu p^3}{L(1+p)} + 2p^2 \right) \cdot \frac{L(L + \mu)}{L - \mu} \leq \frac{\mu(L + \mu)p}{2L(1+p)}.$$

The above inequality holds when:

$$\|\mathbf{A}\|_F \leq \frac{\mu(L + \mu)p}{6L(1+p)}, \quad (17)$$

$$\frac{p^2}{L - \mu} \leq \frac{1}{6L}, \quad (18)$$

$$\frac{2pL}{L - \mu} \leq \frac{\mu}{6L(1+p)}. \quad (19)$$

Let  $p = \frac{\mu(L-\mu)}{24L^2}$ , then we have  $p < 1$ ,  $pL < \mu$  and

$$\begin{aligned} \frac{p^2}{L - \mu} &\leq \frac{p}{L - \mu} = \frac{\mu}{24L^2} \leq \frac{1}{6L}, \\ \frac{2pL}{L - \mu} &\leq \frac{\mu}{12L} \leq \frac{\mu}{6L(1+p)}, \end{aligned}$$

thus (18) and (19) hold. Finally, (17) holds in view of (16):

$$\frac{\mu(L + \mu)p}{6L(1+p)} \geq \frac{\mu p}{6} = \frac{\mu^2(L - \mu)}{144L^2} \geq \|\mathbf{A}\|_F.$$

Combining the results proves the (15).

Now we can proceed with the induction in Lemma 3. Firstly,  $\|\mathbf{r}_0\| \leq C_1 \|\mathbf{r}_0\|$  as  $C_1 \geq 1$  by (15),  
and  $\|\mathbf{X}_0 - \mathbf{X}_0\|_F = \|\mathbf{Y}_0 - \mathbf{Y}_0\|_F = 0 \leq C_2$ . Suppose the induction conditions in Lemma 2 holds  
for  $s \leq t$ , then we have

$$b_s = C_1 \|\xi_s\| \leq C_1(C_3 \theta^{2s} \|\mathbf{r}_0\|^2 + C_4 \theta^s \|\mathbf{r}_0\|) \leq c_0 \cdot \theta^s.$$

Consequently, by Lemma 6 and (15) we have

$$a_{t+1} \leq \theta^{t+1} \cdot \left( a_0 + \frac{c_0}{\theta - \rho} \right) \leq C_1^2 \cdot \theta^{t+1} \|\mathbf{A}\|_F,$$

thus  $\|\mathbf{r}_{t+1}\| \leq C_1 \theta^{t+1} \|\mathbf{r}_0\|$ . Moreover, by our construction of  $C_1$  and  $C_2$ , (6) always holds, thus  
we also have  $\|\mathbf{X}_{t+1} - \mathbf{X}_0\|_F \leq C_2$  and  $\|\mathbf{Y}_{t+1} - \mathbf{Y}_0\|_F \leq C_2$ . All conditions for the  $t + 1$  step are  
satisfied, hence the proof is completed by induction. Plugging in  $C_1$  and the choice of  $c$  yields the  
results.  $\square$

## 841 C Missing Proofs for NAG

### 842 C.1 Proof of Lemma 3

843 *Proof of Proposition 3.* According to the NAG update rule, we have

$$\begin{aligned}
\mathbf{R}_{t+1} &= \mathbf{X}_{t+1} \mathbf{Y}_{t+1}^\top - \mathbf{A} \\
&= (\mathbf{X}_t + \mathbf{P}_t)(\mathbf{Y}_t + \mathbf{Q}_t)^\top - \mathbf{A} \\
&= \mathbf{R}_t + \mathbf{P}_t \mathbf{Y}_t^\top + \mathbf{X}_t \mathbf{Q}_t^\top + \mathbf{P}_t \mathbf{Q}_t^\top \\
&= \mathbf{R}_t + (\beta(\mathbf{X}_t - \mathbf{X}_{t-1}) - (1 + \beta)\eta \mathbf{R}_t \mathbf{Y}_t + \beta\eta \mathbf{R}_{t-1} \mathbf{Y}_{t-1}) \mathbf{Y}_t^\top \\
&\quad + \mathbf{X}_t (\beta(\mathbf{Y}_t^\top - \mathbf{Y}_{t-1}^\top) - (1 + \beta)\eta \mathbf{X}_t^\top \mathbf{R}_t + \beta\eta \mathbf{X}_{t-1}^\top \mathbf{R}_{t-1}) + \mathbf{P}_t \mathbf{Q}_t^\top \\
&= \mathbf{R}_t - (1 + \beta)\eta (\mathbf{R}_t \mathbf{Y}_t \mathbf{Y}_t^\top + \mathbf{X}_t \mathbf{X}_t^\top \mathbf{R}_t) + \beta(\mathbf{X}_t \mathbf{Y}_t^\top - \mathbf{X}_{t-1} \mathbf{Y}_{t-1}^\top) \\
&\quad + \beta\eta (\mathbf{R}_{t-1} \mathbf{Y}_{t-1} \mathbf{Y}_{t-1}^\top + \mathbf{X}_{t-1} \mathbf{X}_{t-1}^\top \mathbf{R}_{t-1}) + \beta(\mathbf{X}_t \mathbf{Y}_t^\top + \mathbf{X}_{t-1} \mathbf{Y}_{t-1}^\top) - \beta(\mathbf{X}_{t-1} \mathbf{Y}_t^\top + \mathbf{X}_t \mathbf{Y}_{t-1}^\top) \\
&\quad + \beta\eta (\mathbf{R}_{t-1} \mathbf{Y}_{t-1} \mathbf{Y}_t^\top + \mathbf{X}_t \mathbf{X}_{t-1}^\top \mathbf{R}_{t-1} - \mathbf{R}_{t-1} \mathbf{Y}_{t-1} \mathbf{Y}_{t-1}^\top - \mathbf{X}_{t-1} \mathbf{X}_{t-1}^\top \mathbf{R}_{t-1}) + \mathbf{P}_t \mathbf{Q}_t^\top \\
&= \mathbf{R}_t - (1 + \beta)\eta (\mathbf{R}_t \mathbf{Y}_t \mathbf{Y}_t^\top + \mathbf{X}_t \mathbf{X}_t^\top \mathbf{R}_t) + \beta(\mathbf{R}_t - \mathbf{R}_{t-1}) \\
&\quad + \beta\eta (\mathbf{R}_{t-1} \mathbf{Y}_{t-1} \mathbf{Y}_{t-1}^\top + \mathbf{X}_{t-1} \mathbf{X}_{t-1}^\top \mathbf{R}_{t-1}) + \beta(\mathbf{X}_t \mathbf{Y}_t^\top + \mathbf{X}_{t-1} \mathbf{Y}_{t-1}^\top - \mathbf{X}_{t-1} \mathbf{Y}_t^\top - \mathbf{X}_t \mathbf{Y}_{t-1}^\top) \\
&\quad + \beta\eta (\mathbf{R}_{t-1} \mathbf{Y}_{t-1} \mathbf{Y}_t^\top + \mathbf{X}_t \mathbf{X}_{t-1}^\top \mathbf{R}_{t-1} - \mathbf{R}_{t-1} \mathbf{Y}_{t-1} \mathbf{Y}_{t-1}^\top - \mathbf{X}_{t-1} \mathbf{X}_{t-1}^\top \mathbf{R}_{t-1}) + \mathbf{P}_t \mathbf{Q}_t^\top.
\end{aligned}$$

844 Applying vectorization on both sides yields

$$\begin{aligned}
\mathbf{r}_{t+1} &= \mathbf{r}_t - (1 + \beta)\eta \mathbf{H}_t \mathbf{r}_t + \beta(\mathbf{r}_t - \mathbf{r}_{t-1}) + \beta\eta \mathbf{H}_{t-1} \mathbf{r}_{t-1} \\
&\quad + \beta \text{vec}(\mathbf{X}_t \mathbf{Y}_t^\top + \mathbf{X}_{t-1} \mathbf{Y}_{t-1}^\top - \mathbf{X}_{t-1} \mathbf{Y}_t^\top - \mathbf{X}_t \mathbf{Y}_{t-1}^\top) \\
&\quad + \beta\eta \text{vec}(\mathbf{R}_{t-1} \mathbf{Y}_{t-1} \mathbf{Y}_t^\top + \mathbf{X}_t \mathbf{X}_{t-1}^\top \mathbf{R}_{t-1} - \mathbf{R}_{t-1} \mathbf{Y}_{t-1} \mathbf{Y}_{t-1}^\top - \mathbf{X}_{t-1} \mathbf{X}_{t-1}^\top \mathbf{R}_{t-1}) + \text{vec}(\mathbf{P}_t \mathbf{Q}_t^\top) \\
&= (1 + \beta)(\mathbf{I}_{mn} - \eta \mathbf{H}_t) \mathbf{r}_t - \beta(\mathbf{I}_{mn} - \eta \mathbf{H}_{t-1}) \mathbf{r}_{t-1} + \psi_t + \phi_t.
\end{aligned}$$

845 Hence we have

$$\begin{pmatrix} \mathbf{r}_{t+1} \\ \mathbf{r}_t \end{pmatrix} = \begin{pmatrix} (1 + \beta)(\mathbf{I}_{mn} - \eta \mathbf{H}_0) & -\beta(\mathbf{I}_{mn} - \eta \mathbf{H}_0) \\ \mathbf{I}_{mn} & 0 \end{pmatrix} \begin{pmatrix} \mathbf{r}_t \\ \mathbf{r}_{t-1} \end{pmatrix} + \begin{pmatrix} \xi_t \\ 0 \end{pmatrix}.$$

846 □

### 847 C.2 Proof of Lemma 4

848 *Proof of Lemma 4.* Suppose  $\lambda$  is an eigenvalue of  $\mathbf{T}_{\text{NAG}}$ , then we have

$$\det(\mathbf{T}_{\text{NAG}} - \lambda \mathbf{I}_{2mn}) = \det((\beta + \lambda^2 - (1 + \beta)\lambda) \mathbf{I}_{mn} + (\eta(1 + \beta)\lambda - \eta\beta) \mathbf{H}_0).$$

849 Since  $\mathbf{H}_0$  is symmetric, it can be simultaneously diagonalized with  $\mathbf{I}$ , hence the above equation  
850 becomes

$$\lambda^2 - (1 + \beta)\lambda + \beta + \eta(1 + \beta)\lambda_i(\mathbf{H}_0)\lambda - \eta\beta\lambda_i(\mathbf{H}_0) = 0$$

851 for some  $1 \leq i \leq mn$ . Solving the equation yields

$$\lambda = \frac{1}{2} \left( (1 + \beta)(1 - \eta\lambda_i(\mathbf{H}_0)) \pm \sqrt{(1 - \eta\lambda_i(\mathbf{H}_0))(-4\beta + (1 + \beta)^2(1 - \eta\lambda_i(\mathbf{H}_0)))} \right).$$

852 For  $i > nr$ ,  $\lambda_i(\mathbf{H}_0) = 0$ , hence  $\lambda = 1$  or  $\lambda = \beta$ . The corresponding eigen subspaces are

$$\begin{aligned}
\mathcal{H}_1 &= \{(\mathbf{u}^\top, \mathbf{v}^\top)^\top \mid \mathbf{u} = \mathbf{v} \in \ker(\mathbf{H}_0)\}, \\
\mathcal{H}_\beta &= \{(\mathbf{u}^\top, \mathbf{v}^\top)^\top \mid \mathbf{u} = \beta\mathbf{v} \in \ker(\mathbf{H}_0)\}.
\end{aligned}$$

853 The dimensions are  $\dim(\mathcal{H}_1) = \dim(\mathcal{H}_\beta) = (m - r)n$ . It is easy to verify that whenever  $0 < \beta < 1$ ,

$$\mathcal{H}_1 \oplus \mathcal{H}_\beta = \ker(\mathcal{H}_0) \times \ker(\mathcal{H}_0).$$

854 The complement space of  $\mathcal{H}_1 \oplus \mathcal{H}_\beta$  corresponds to the eigen subspace for non-trivial eigenvalues.  
855 By checking the dimension and orthogonality, we have

$$(\mathcal{H}_1 \oplus \mathcal{H}_\beta)^\perp = \mathcal{H} \times \mathcal{H}.$$

856 For  $i \leq nr$ , the subspace is  $\mathcal{H} \times \mathcal{H}$  and the contraction condition requires

$$0 < \eta < \frac{2(1+\beta)}{(1+2\beta)\sigma_1^2(\mathbf{X}_0)} = \frac{2(1+\beta)}{(1+2\beta)L}.$$

857 By checking the monotonicity of  $|\lambda|$  with respect to  $1 - \eta\lambda_i(\mathbf{H}_0) \in [1 - \eta L, 1 - \eta\mu]$ , we have

$$|\lambda| \leq \max \left\{ \frac{1}{2} \left( (1+\beta)(1-\eta\mu) + \sqrt{(1-\eta\mu)(-4\beta + (1+\beta)^2(1-\eta\mu))} \right), \right. \\ \left. \frac{1}{2} \left( -(1+\beta)(1-\eta L) + \sqrt{(1-\eta L)(-4\beta + (1+\beta)^2(1-\eta L))} \right) \right\}.$$

858 If we choose step size  $\eta = \frac{1}{L}$ , momentum  $\beta = \frac{\sqrt{L}-\sqrt{\mu}}{\sqrt{L}+\sqrt{\mu}}$ , then we have  $|\lambda| \leq 1 - \sqrt{\frac{\mu}{L}}$ .  $\square$

### 859 C.3 Proof of Lemma 5

860 *Proof of Lemma 5.* According to Lemma 3,

$$\begin{aligned} \boldsymbol{\xi}_t &= \boldsymbol{\zeta}_t + \boldsymbol{\iota}_t, \\ \boldsymbol{\zeta}_t &= \text{vec}(\mathbf{P}_t \mathbf{Q}_t^\top) + \beta \text{vec}(\eta \mathbf{R}_{t-1} \mathbf{Y}_{t-1} \mathbf{Q}_{t-1}^\top + \eta \mathbf{P}_{t-1} \mathbf{X}_{t-1}^\top \mathbf{R}_{t-1} + \mathbf{P}_{t-1} \mathbf{Q}_{t-1}^\top) \\ \boldsymbol{\iota}_t &= (1+\beta)\eta(\mathbf{H}_0 - \mathbf{H}_t)\mathbf{r}_t - \beta\eta(\mathbf{H}_0 - \mathbf{H}_{t-1})\mathbf{r}_{t-1}. \end{aligned}$$

861 We first bound  $\|\mathbf{P}_t\|_F$  and  $\|\mathbf{Q}_t\|_F$ . For every  $0 \leq s \leq t$ , we have

$$\begin{aligned} \|\mathbf{R}_s \mathbf{Y}_s\|_F &\leq \|\mathbf{Y}_s\| \|\mathbf{R}_s\|_F \\ &\leq (\|\mathbf{Y}_0\| + \|\mathbf{Y}_s - \mathbf{Y}_0\|) \|\mathbf{R}_s\|_F \\ &\leq (\|\mathbf{Y}_0\| + \|\mathbf{Y}_s - \mathbf{Y}_0\|_F) \|\mathbf{R}_s\|_F \\ &\leq (\|\mathbf{Y}_0\| + C_2) \|\mathbf{R}_s\|_F. \end{aligned}$$

862 Similarly,

$$\|\mathbf{R}_s^\top \mathbf{X}_s\|_F \leq (\|\mathbf{X}_0\| + C_2) \|\mathbf{R}_s\|_F.$$

863 By assumption, we have

$$\|\mathbf{R}_s\|_F \leq \left\| \begin{pmatrix} \mathbf{r}_s \\ \mathbf{r}_{s-1} \end{pmatrix} \right\| \leq C_1 \theta^s \left\| \begin{pmatrix} \mathbf{r}_0 \\ \mathbf{r}_{-1} \end{pmatrix} \right\|.$$

864 As a result, the momentum terms can be bounded:

$$\begin{aligned} \|\mathbf{P}_t\|_F &= \left\| \eta \mathbf{R}_t \mathbf{Y}_t + \eta \sum_{s=1}^t \beta^{t-s+1} \mathbf{R}_s \mathbf{Y}_s \right\|_F \\ &\leq \eta \|\mathbf{R}_t \mathbf{Y}_t\|_F + \eta \sum_{s=1}^t \beta^{t-s+1} \|\mathbf{R}_s \mathbf{Y}_s\|_F \\ &\leq \eta (\|\mathbf{Y}_0\| + C_2) \left( \|\mathbf{R}_t\|_F + \sum_{s=1}^t \beta^{t-s+1} \|\mathbf{R}_s\|_F \right) \\ &\leq \eta C_1 (\|\mathbf{Y}_0\| + C_2) \left( \theta^t + \sum_{s=1}^t \beta^{t-s+1} \theta^s \right) \left\| \begin{pmatrix} \mathbf{r}_0 \\ \mathbf{r}_{-1} \end{pmatrix} \right\| \\ &\leq \eta C_1 (\|\mathbf{Y}_0\| + C_2) \frac{1}{1-\theta} \cdot \theta^t \left\| \begin{pmatrix} \mathbf{r}_0 \\ \mathbf{r}_{-1} \end{pmatrix} \right\|, \end{aligned} \tag{20}$$

865 and

$$\|\mathbf{Q}_t\|_F \leq \eta C_1 (\|\mathbf{X}_0\| + C_2) \frac{1}{1-\theta} \cdot \theta^t \left\| \begin{pmatrix} \mathbf{r}_0 \\ \mathbf{r}_{-1} \end{pmatrix} \right\|, \tag{21}$$

866 where we use  $\beta \leq \theta^2 < \theta$  in the last steps.

867 Next, we bound  $\|\boldsymbol{\zeta}_t\|$ . Using the triangle inequality, we get

$$\|\boldsymbol{\zeta}_t\| \leq \|\mathbf{P}_t \mathbf{Q}_t^\top\|_F + \beta \|\eta \mathbf{R}_{t-1} \mathbf{Y}_{t-1} \mathbf{Q}_{t-1}^\top + \eta \mathbf{P}_{t-1} \mathbf{X}_{t-1}^\top \mathbf{R}_{t-1} + \mathbf{P}_{t-1} \mathbf{Q}_{t-1}^\top\|_F.$$

868 For the first term, we have

$$\|\mathbf{P}_t \mathbf{Q}_t^\top\|_F \leq \|\mathbf{P}_t\|_F \|\mathbf{Q}_t\|_F \leq \frac{\eta^2 C_1^2 (\|\mathbf{X}_0\| + C_2)(\|\mathbf{Y}_0\| + C_2)}{(1-\theta)^2} \theta^{2t} \left\| \begin{pmatrix} \mathbf{r}_0 \\ \mathbf{r}_{-1} \end{pmatrix} \right\|^2.$$

869 For the second term, we have

$$\begin{aligned} & \beta \|\eta \mathbf{R}_{t-1} \mathbf{Y}_{t-1} \mathbf{Q}_{t-1}^\top + \eta \mathbf{P}_{t-1} \mathbf{X}_{t-1}^\top \mathbf{R}_{t-1} + \mathbf{P}_{t-1} \mathbf{Q}_{t-1}^\top\|_F \\ & \leq \beta (\eta \|\mathbf{R}_{t-1}\|_F (\|\mathbf{Y}_{t-1}\| \|\mathbf{Q}_{t-1}\|_F + \|\mathbf{X}_{t-1}\| \|\mathbf{P}_{t-1}\|_F) + \|\mathbf{P}_{t-1}\|_F \|\mathbf{Q}_{t-1}\|_F) \\ & \leq \frac{\eta^2 C_1^2 (\|\mathbf{X}_0\| + C_2)(\|\mathbf{Y}_0\| + C_2)(3-2\theta)}{(1-\theta)^2} \theta^{2t} \left\| \begin{pmatrix} \mathbf{r}_0 \\ \mathbf{r}_{-1} \end{pmatrix} \right\|^2. \end{aligned}$$

870 As a result, we have

$$\|\boldsymbol{\zeta}_t\| \leq C_3 \theta^{2t} \left\| \begin{pmatrix} \mathbf{r}_0 \\ \mathbf{r}_{-1} \end{pmatrix} \right\|^2,$$

871 where  $C_3 = \frac{\eta^2 C_1^2 (\|\mathbf{X}_0\| + C_2)(\|\mathbf{Y}_0\| + C_2)(4-2\theta)}{(1-\theta)^2}$ .

872 We then show upper bound for  $\|\boldsymbol{\iota}_t\|$ . Using the triangle inequality, we get

$$\|\boldsymbol{\iota}_t\| \leq (1+\beta)\eta \|(\mathbf{H}_0 - \mathbf{H}_t)\mathbf{r}_t\| + \beta\eta \|(\mathbf{H}_0 - \mathbf{H}_{t-1})\mathbf{r}_{t-1}\|. \quad (22)$$

873 For any  $s \leq t$ , we have

$$\begin{aligned} \|(\mathbf{H}_0 - \mathbf{H}_s)\mathbf{r}_s\| &= \|\mathbf{R}_s(\mathbf{Y}_0 \mathbf{Y}_0^\top - \mathbf{Y}_s \mathbf{Y}_s^\top) + (\mathbf{X}_0 \mathbf{X}_0^\top - \mathbf{X}_s \mathbf{X}_s^\top) \mathbf{R}_s\|_F \\ &\leq \|\mathbf{R}_s(\mathbf{Y}_0 \mathbf{Y}_0^\top - \mathbf{Y}_s \mathbf{Y}_s^\top)\|_F + \|(\mathbf{X}_0 \mathbf{X}_0^\top - \mathbf{X}_s \mathbf{X}_s^\top) \mathbf{R}_s\|_F \\ &\leq \|\mathbf{Y}_0 \mathbf{Y}_0^\top - \mathbf{Y}_s \mathbf{Y}_s^\top\| \|\mathbf{R}_s\|_F + \|\mathbf{X}_0 \mathbf{X}_0^\top - \mathbf{X}_s \mathbf{X}_s^\top\| \|\mathbf{R}_s\|_F \\ &\leq (2\|\mathbf{Y}_0\| + \|\mathbf{Y}_s - \mathbf{Y}_0\|_F) \|\mathbf{Y}_s - \mathbf{Y}_0\|_F \|\mathbf{R}_s\|_F \\ &\quad + (2\|\mathbf{X}_0\| + \|\mathbf{X}_s - \mathbf{X}_0\|_F) \|\mathbf{X}_s - \mathbf{X}_0\|_F \|\mathbf{R}_s\|_F \\ &\leq 2(\|\mathbf{X}_0\| + \|\mathbf{Y}_0\| + C_2) C_2 \|\mathbf{R}_s\|_F \\ &\leq 2(\|\mathbf{X}_0\| + \|\mathbf{Y}_0\| + C_2) C_1 C_2 \theta^s \left\| \begin{pmatrix} \mathbf{r}_0 \\ \mathbf{r}_{-1} \end{pmatrix} \right\|. \end{aligned}$$

874 Plugging it into (22) yields

$$\begin{aligned} \|\boldsymbol{\iota}_t\| &\leq 2(\|\mathbf{X}_0\| + \|\mathbf{Y}_0\| + C_2) C_1 C_2 ((1+\beta)\eta \theta^t + \beta\eta \theta^{t-1}) \left\| \begin{pmatrix} \mathbf{r}_0 \\ \mathbf{r}_{-1} \end{pmatrix} \right\| \\ &\leq C_4 \theta^t \left\| \begin{pmatrix} \mathbf{r}_0 \\ \mathbf{r}_{-1} \end{pmatrix} \right\|, \end{aligned}$$

875 where  $C_4 = 2\eta(\|\mathbf{X}_0\| + \|\mathbf{Y}_0\| + C_2) C_1 C_2 (1+2\theta)$ .

876 Finally, given (9) and (20), we have

$$\|\mathbf{X}_{t+1} - \mathbf{X}_0\|_F \leq \sum_{s=0}^t \|\mathbf{P}_s\|_F \leq \frac{\eta C_1 (\|\mathbf{Y}_0\| + C_2)}{(1-\theta)^2} \left\| \begin{pmatrix} \mathbf{r}_0 \\ \mathbf{r}_{-1} \end{pmatrix} \right\| \leq C_2,$$

877 where the last inequality is from our assumption on  $C_2$ . Similarly, by (21), we have

$$\|\mathbf{Y}_{t+1} - \mathbf{Y}_0\|_F \leq \sum_{s=0}^t \|\mathbf{Q}_s\|_F \leq \frac{\eta C_1 (\|\mathbf{X}_0\| + C_2)}{(1-\theta)^2} \left\| \begin{pmatrix} \mathbf{r}_0 \\ \mathbf{r}_{-1} \end{pmatrix} \right\| \leq C_2.$$

878 □

## 879 C.4 Proof of Theorem 2

880 *Proof of Theorem 2.* By initialization, we have  $\|\mathbf{r}_0\| = \|\mathbf{r}_{-1}\| = \|\mathbf{A}\|_F$ . Let  $C_1$  to  $C_4$  be constants  
881 defined in Lemma 5. Define  $\rho = 1 - \frac{\sqrt{\mu}}{\sqrt{L}}$ ,  $\theta = 1 - \frac{\sqrt{\mu}}{2\sqrt{L}}$ ,  $a_t = \sqrt{2} C_1 \|\mathbf{A}\|_F$ , and  $b_t = C_1 \|\boldsymbol{\xi}_t\|$  for  
882  $t \geq 0$ . It is easy to verify that  $\beta \leq \theta^2 < \theta < 1$  and  $\rho < \theta < 1$ . By Proposition 3 and lemmas 1 and 4  
883 we have

$$a_{t+1} \leq \rho \cdot a_t + b_t$$

for all  $t \geq 0$ . It remains to show that  $b_t \leq \theta^t \cdot c_0$ . For the initial step,  $a_0 = \sqrt{2}C_1 \|\mathbf{A}\|_F$ ,  $b_0 = 0$ . Let  $C_1 = \frac{\mu p}{4\sqrt{2}\|\mathbf{A}\|_F(1+p)}$  and  $C_2 = p\sqrt{L}$  where  $p = \frac{\sqrt{\mu}}{144\sqrt{L}} \leq \frac{1}{144} < 1$ , then we have

$$C_3 = \frac{\mu p^3(2 + \sqrt{\frac{\mu}{L}})}{8\|\mathbf{A}\|_F^2(1+p)}, \quad C_4 = \frac{\mu p^2(3 - \sqrt{\frac{\mu}{L}})}{2\sqrt{2}\|\mathbf{A}\|_F}.$$

Let  $c_0 = \sqrt{2}C_1(\sqrt{2}C_3\|\mathbf{A}\|_F + C_4)\|\mathbf{A}\|_F$ , then we can show the following relations:

$$a_0 + \frac{c_0}{\theta - \rho} \leq \sqrt{2}C_1^2\|\mathbf{A}\|_F \quad \text{and} \quad C_1 \geq 1. \quad (23)$$

Indeed, by Proposition 1, with probability at least  $1 - \delta$ , our choice of  $c$  guarantees

$$\mu = \sigma_r^2(\mathbf{X}_0) \geq \frac{\tau^2(\sqrt{d} - \sqrt{r-1})^2 c^2 \sigma_r^2(\mathbf{A})}{d} \geq \frac{4\sqrt{2}\|\mathbf{A}\|_F(1+p)}{p}, \quad (24)$$

thus  $C_1 \geq 1$ . Here, we use the bound  $p \leq \frac{1}{144} < 1$  to verify the numerical constant. It remains to show

$$a_0 + \frac{c_0}{\theta - \rho} \leq \sqrt{2}C_1^2\|\mathbf{A}\|_F,$$

which is equivalent to

$$\|\mathbf{A}\|_F + \frac{p^3\sqrt{\mu L}(2 + \sqrt{\frac{\mu}{L}})}{2\sqrt{2}(1+p)} + \frac{p^2\sqrt{\mu L}(3 - \sqrt{\frac{\mu}{L}})}{\sqrt{2}} \leq \frac{\mu p}{4\sqrt{2}(1+p)},$$

Since we set  $p = \frac{\sqrt{\mu}}{144\sqrt{L}} < 1$ , each one of the three terms on the left hand side is upper bounded by  $\frac{\mu p}{12\sqrt{2}(1+p)}$ , hence the inequality holds. The relations (23) guarantee the induction conditions in Lemma 5, thus we have

$$\|\mathbf{r}_{t+1}\| \leq \sqrt{2}C_1\theta^{t+1}\|\mathbf{A}\|_F \leq \frac{c^2\sigma_1^2(\mathbf{A})}{64\|\mathbf{A}\|_F \text{cond}(\mathbf{X}_0)}\theta^{t+1}\|\mathbf{A}\|_F,$$

where the last inequality uses  $p > 0$  and Proposition 1.  $\square$

## D Missing Proofs for NAG in Section 4

Let  $\tilde{\mathbf{r}}_t = \text{vec}(\tilde{\mathbf{R}}_t)$ , then we have the following dynamics.

**Lemma 7.** Let  $\mathbf{P}_t = \mathbf{X}_{t+1} - \mathbf{X}_t$  and  $\mathbf{Q}_t = \mathbf{Y}_{t+1} - \mathbf{Y}_t$  denote the momentum. Let  $\mathbf{R}_t = \mathbf{X}_t \mathbf{Y}_t^\top \mathbf{D} - \mathbf{L}$  denote the residual,  $\tilde{\mathbf{R}}_t = \mathbf{X}_t \mathbf{Y}_t^\top \mathbf{D} \mathbf{D}^\top - \mathbf{L} \mathbf{D}^\top$  denote the projected residual,  $\tilde{\mathbf{r}}_t = \text{vec}(\tilde{\mathbf{R}}_t) \in \mathbb{R}^{mn}$ . Then NAG has the following dynamics:

$$\begin{pmatrix} \tilde{\mathbf{r}}_{t+1} \\ \tilde{\mathbf{r}}_t \end{pmatrix} = \begin{pmatrix} (1+\beta)(\mathbf{I}_{mn} - \eta \mathbf{H}_0) & -\beta(\mathbf{I}_{mn} - \eta \mathbf{H}_0) \\ \mathbf{I}_{mn} & 0 \end{pmatrix} \begin{pmatrix} \tilde{\mathbf{r}}_t \\ \tilde{\mathbf{r}}_{t-1} \end{pmatrix} + \begin{pmatrix} \xi_t \\ 0 \end{pmatrix}, \quad (25)$$

where

$$\begin{aligned} \mathbf{H}_t &= (\mathbf{D} \mathbf{D}^\top \mathbf{Y}_t \mathbf{Y}_t^\top) \otimes \mathbf{I}_m + (\mathbf{D} \mathbf{D}^\top) \otimes (\mathbf{X}_t \mathbf{X}_t^\top), \\ \xi_t &= \zeta_t + \nu_t, \\ \zeta_t &= \text{vec}(\mathbf{P}_t \mathbf{Q}_t^\top \mathbf{D} \mathbf{D}^\top) + \beta \text{vec}(\mathbf{P}_{t-1} \mathbf{Q}_{t-1}^\top \mathbf{D} \mathbf{D}^\top) \\ &\quad + \beta \eta \text{vec}((\tilde{\mathbf{R}}_{t-1} \mathbf{Y}_{t-1} \mathbf{Q}_{t-1}^\top + \mathbf{P}_{t-1} \mathbf{X}_{t-1}^\top \tilde{\mathbf{R}}_{t-1}) \mathbf{D} \mathbf{D}^\top), \\ \nu_t &= (1+\beta)\eta(\mathbf{H}_0 - \mathbf{H}_t)\tilde{\mathbf{r}}_t - \beta\eta(\mathbf{H}_0 - \mathbf{H}_{t-1})\tilde{\mathbf{r}}_{t-1}. \end{aligned}$$

*Proof of Lemma 7.* We denote  $\mathbf{R}_t = \mathbf{X}_t \mathbf{Y}_t^\top \mathbf{D} - \mathbf{L}$  as the residual,  $\tilde{\mathbf{R}}_t = \mathbf{R}_t \mathbf{D}^\top$  as the projected residual, then the NAG update for (10) can be written as

$$\begin{pmatrix} \mathbf{X}_{t+1} \\ \mathbf{Y}_{t+1} \end{pmatrix} = \begin{pmatrix} (1+\beta)(\mathbf{X}_t - \eta \tilde{\mathbf{R}}_t \mathbf{Y}_t) - \beta(\mathbf{X}_{t-1} - \eta \tilde{\mathbf{R}}_{t-1} \mathbf{Y}_{t-1}) \\ (1+\beta)(\mathbf{Y}_t - \eta \tilde{\mathbf{R}}_t^\top \mathbf{X}_t) - \beta(\mathbf{Y}_{t-1} - \eta \tilde{\mathbf{R}}_{t-1}^\top \mathbf{X}_{t-1}) \end{pmatrix}. \quad (26)$$

The result follows from (26) by direct computation.  $\square$

904 **Lemma 8.** Let  $\mathcal{H} \subseteq \mathbb{R}^{mn}$  denote the linear subspace containing all eigenvectors of  $\mathbf{H}_0 = (\mathbf{D}\mathbf{D}^\top) \otimes$   
 905  $(\mathbf{X}_0\mathbf{X}_0^\top)$  with positive eigenvalues. If  $\text{col}(\mathbf{X}_0) = \text{col}(\mathbf{L})$  and  $\mathbf{Y}_0 = 0$ , then we have

$$\mathcal{H} = \text{col}(\mathbf{D} \otimes \mathbf{L}) \quad \text{and} \quad \{\tilde{\mathbf{r}}_t, \tilde{\boldsymbol{\xi}}_t\}_{t \geq 0} \subset \mathcal{H},$$

906 where  $\mathbf{H}_0$ ,  $\tilde{\mathbf{r}}_t$  and  $\tilde{\boldsymbol{\xi}}_t$  are defined as in Lemma 7.

907 *Proof.* By Theorem 4.2.15 in Horn and Johnson [1994], we have the following eigenvalue decompo-  
 908 sition for Kronecker product:

$$\mathbf{H}_0 = (\mathbf{U}_D \otimes \mathbf{U}_0)(\boldsymbol{\Sigma}_D^2 \otimes \boldsymbol{\Sigma}_0^2)(\mathbf{U}_D \otimes \mathbf{U}_0)^\top,$$

909 where  $\mathbf{D} = \mathbf{U}_D \boldsymbol{\Sigma}_D \mathbf{V}_D^\top$  and  $\mathbf{X}_0 = \mathbf{U}_0 \boldsymbol{\Sigma}_0 \mathbf{V}_0^\top$  are singular value decompositions of  $\mathbf{D}$  and  $\mathbf{X}_0$ .  
 910 Therefore, we have

$$\mathcal{H} = \text{col}(\mathbf{U}_D \otimes \mathbf{U}_0) = \text{col}(\mathbf{D} \otimes \mathbf{X}_0) = \text{col}(\mathbf{D} \otimes \mathbf{L}).$$

911 In particular, the eigenvalues (not ordered) are

$$\lambda_{(i-1)m+j}(\mathbf{H}_0) = \lambda_i(\mathbf{D}\mathbf{D}^\top) \lambda_j(\mathbf{X}_0\mathbf{X}_0^\top) = \sigma_i^2(\mathbf{D}) \sigma_j^2(\mathbf{X}_0), \quad i \in [n], j \in [m],$$

912 where  $\sigma_j(\mathbf{X}_0) > 0$  for  $1 \leq j \leq r$ ,  $\sigma_j(\mathbf{X}_0) = 0$  for  $r+1 \leq j \leq d$ . By Assumption 1,  $\mathbf{L} = \mathbf{A}\mathbf{D}$ ,  
 913 thus we have

$$\text{vec}(\mathbf{L}\mathbf{D}^\top) = \text{vec}(\mathbf{L}\mathbf{I}_N \mathbf{D}^\top) = (\mathbf{D} \otimes \mathbf{L}) \mathbf{I}_N \in \text{col}(\mathbf{D} \otimes \mathbf{L}) = \mathcal{H}.$$

914 Meanwhile,

$$\text{vec}(\mathbf{X}_t \mathbf{Y}_t^\top \mathbf{D}\mathbf{D}^\top) = (\mathbf{D} \otimes \mathbf{X}_t) \text{vec}(\mathbf{Y}_t^\top \mathbf{D}) \in \text{col}(\mathbf{D} \otimes \mathbf{X}_t) \subseteq \text{col}(\mathbf{D} \otimes \mathbf{X}_0) = \mathcal{H},$$

915 thus we have  $\tilde{\mathbf{r}}_t \in \mathcal{H}$ . Similarly, we have  $\tilde{\boldsymbol{\xi}}_t \in \mathcal{H}$ .  $\square$

916 **Lemma 9** (NAG contraction). If we choose step size  $\eta = \frac{1}{L}$  and momentum  $\beta = \frac{\sqrt{\tilde{L}} - \sqrt{\tilde{\mu}}}{\sqrt{\tilde{L}} + \sqrt{\tilde{\mu}}}$  where  
 917  $\tilde{L} = \sigma_1^2(\mathbf{X}_0) \cdot \lambda_{\max}(\mathbf{D}\mathbf{D}^\top)$ ,  $\tilde{\mu} = \sigma_r^2(\mathbf{X}_0) \cdot \lambda_{\min}(\mathbf{D}\mathbf{D}^\top)$ , then for all  $(\mathbf{u}, \mathbf{v}) \in \mathcal{H} \times \mathcal{H}$ ,  $\mathcal{H}$  defined in  
 918 Lemma 8,

$$\left\| \mathbf{T}_{\text{NAG}} \begin{pmatrix} \mathbf{u} \\ \mathbf{v} \end{pmatrix} \right\| \leq \left( 1 - \sqrt{\frac{\tilde{\mu}}{\tilde{L}}} \right) \left\| \begin{pmatrix} \mathbf{u} \\ \mathbf{v} \end{pmatrix} \right\|.$$

919 *Proof.* Following the same line of proof for Lemma 4 in Appendix C.2 and substituting the eigenval-  
 920 ues in Lemma 8, we obtain the result.  $\square$

921 **Lemma 10.** Suppose  $0 < \beta \leq \theta^2 < \theta < 1$ . If there exist some constants  $C_1$  and  $C_2$  such that for  
 922 any  $s \leq t$ , the NAG dynamics (7) yields  $\left\| \begin{pmatrix} \tilde{\mathbf{r}}_s \\ \tilde{\mathbf{r}}_{s-1} \end{pmatrix} \right\| \leq C_1 \theta^s \left\| \begin{pmatrix} \tilde{\mathbf{r}}_0 \\ \tilde{\mathbf{r}}_{-1} \end{pmatrix} \right\|$ ,  $\|\mathbf{X}_s - \mathbf{X}_0\|_F \leq C_2$ , and  
 923  $\|\mathbf{Y}_s - \mathbf{Y}_0\|_F \leq C_2$ , then we have

$$\|\zeta_t\| \leq C_3 \theta^{2t} \left\| \begin{pmatrix} \tilde{\mathbf{r}}_0 \\ \tilde{\mathbf{r}}_{-1} \end{pmatrix} \right\|^2, \quad \text{and} \quad \|\boldsymbol{\iota}_t\| \leq C_4 \theta^t \left\| \begin{pmatrix} \tilde{\mathbf{r}}_0 \\ \tilde{\mathbf{r}}_{-1} \end{pmatrix} \right\|$$

924 for some constants  $C_3$  and  $C_4$  depending on  $C_1$  and  $C_2$ . Moreover, if  $C_1$  and  $C_2$  satisfy

$$(\max(\|\mathbf{X}_0\|, \|\mathbf{Y}_0\|) + C_2) \eta C_1 \left\| \begin{pmatrix} \tilde{\mathbf{r}}_0 \\ \tilde{\mathbf{r}}_{-1} \end{pmatrix} \right\| \leq (1 - \theta)^2 C_2,$$

925 then we have

$$\|\mathbf{X}_{t+1} - \mathbf{X}_0\|_F \leq C_2, \quad \|\mathbf{Y}_{t+1} - \mathbf{Y}_0\|_F \leq C_2.$$

926 *Proof of Lemma 10.* Following the same line of proof for Lemma 5 in Appendix C.3, we have

$$\|\mathbf{P}_t\|_F \leq \eta C_1 (\|\mathbf{Y}_0\| + C_2) \frac{1}{1 - \theta} \cdot \theta^t \left\| \begin{pmatrix} \tilde{\mathbf{r}}_0 \\ \tilde{\mathbf{r}}_{-1} \end{pmatrix} \right\|, \quad (27)$$

927 and

$$\|\mathbf{Q}_t\|_F \leq \eta C_1 (\|\mathbf{X}_0\| + C_2) \frac{1}{1 - \theta} \cdot \theta^t \left\| \begin{pmatrix} \tilde{\mathbf{r}}_0 \\ \tilde{\mathbf{r}}_{-1} \end{pmatrix} \right\|. \quad (28)$$

928 As a result, we have

$$\|\mathbf{P}_t \mathbf{Q}_t^\top \mathbf{D} \mathbf{D}^\top\|_F \leq \lambda_1(\mathbf{D} \mathbf{D}^\top) \|\mathbf{P}_t\|_F \|\mathbf{Q}_t\|_F \leq \frac{\eta^2 C_1^2 (\|\mathbf{X}_0\| + C_2)(\|\mathbf{Y}_0\| + C_2) \lambda_1(\mathbf{D} \mathbf{D}^\top)}{(1 - \theta)^2} \theta^{2t} \left\| \begin{pmatrix} \tilde{\mathbf{r}}_0 \\ \tilde{\mathbf{r}}_{-1} \end{pmatrix} \right\|^2,$$

929 and

$$\begin{aligned} & \beta \left\| (\eta \tilde{\mathbf{R}}_{t-1} \mathbf{Y}_{t-1} \mathbf{Q}_{t-1}^\top + \eta \mathbf{P}_{t-1} \mathbf{X}_{t-1}^\top \tilde{\mathbf{R}}_{t-1} + \mathbf{P}_{t-1} \mathbf{Q}_{t-1}^\top) \mathbf{D} \mathbf{D}^\top \right\|_F \\ & \leq \beta \lambda_1(\mathbf{D} \mathbf{D}^\top) \left( \eta \left\| \tilde{\mathbf{R}}_{t-1} \right\|_F (\|\mathbf{Y}_{t-1}\| \|\mathbf{Q}_{t-1}\|_F + \|\mathbf{X}_{t-1}\| \|\mathbf{P}_{t-1}\|_F) + \|\mathbf{P}_{t-1}\|_F \|\mathbf{Q}_{t-1}\|_F \right) \\ & \leq \frac{\eta^2 C_1^2 (\|\mathbf{X}_0\| + C_2)(\|\mathbf{Y}_0\| + C_2)(3 - 2\theta) \lambda_1(\mathbf{D} \mathbf{D}^\top)}{(1 - \theta)^2} \theta^{2t} \left\| \begin{pmatrix} \tilde{\mathbf{r}}_0 \\ \tilde{\mathbf{r}}_{-1} \end{pmatrix} \right\|^2, \end{aligned}$$

930 Combining the inequalities, we get

$$\|\zeta_t\| \leq C_3 \theta^{2t} \left\| \begin{pmatrix} \tilde{\mathbf{r}}_0 \\ \tilde{\mathbf{r}}_{-1} \end{pmatrix} \right\|^2,$$

931 where  $C_3 = \frac{\eta^2 C_1^2 (\|\mathbf{X}_0\| + C_2)(\|\mathbf{Y}_0\| + C_2)(4 - 2\theta) \lambda_1(\mathbf{D} \mathbf{D}^\top)}{(1 - \theta)^2}$ .

932 Similarly, we have

$$\begin{aligned} \|\mathbf{u}_t\| & \leq 2(\|\mathbf{X}_0\| + \|\mathbf{Y}_0\| + C_2) C_1 C_2 \lambda_1(\mathbf{D} \mathbf{D}^\top) ((1 + \beta) \eta \theta^t + \beta \eta \theta^{t-1}) \left\| \begin{pmatrix} \tilde{\mathbf{r}}_0 \\ \tilde{\mathbf{r}}_{-1} \end{pmatrix} \right\| \\ & \leq C_4 \theta^t \left\| \begin{pmatrix} \tilde{\mathbf{r}}_0 \\ \tilde{\mathbf{r}}_{-1} \end{pmatrix} \right\|, \end{aligned}$$

933 where  $C_4 = 2\eta(\|\mathbf{X}_0\| + \|\mathbf{Y}_0\| + C_2) C_1 C_2 (1 + 2\theta) \lambda_1(\mathbf{D} \mathbf{D}^\top)$ .

934 Finally, by (27), we have

$$\|\mathbf{X}_{t+1} - \mathbf{X}_0\|_F \leq \sum_{s=0}^t \|\mathbf{P}_s\|_F \leq \frac{\eta C_1 (\|\mathbf{Y}_0\| + C_2)}{(1 - \theta)^2} \left\| \begin{pmatrix} \tilde{\mathbf{r}}_0 \\ \tilde{\mathbf{r}}_{-1} \end{pmatrix} \right\| \leq C_2,$$

935 where the last inequality is from our assumption on  $C_2$ . Similarly, by (28), we have

$$\|\mathbf{Y}_{t+1} - \mathbf{Y}_0\|_F \leq \sum_{s=0}^t \|\mathbf{Q}_s\|_F \leq \frac{\eta C_1 (\|\mathbf{X}_0\| + C_2)}{(1 - \theta)^2} \left\| \begin{pmatrix} \tilde{\mathbf{r}}_0 \\ \tilde{\mathbf{r}}_{-1} \end{pmatrix} \right\| \leq C_2.$$

936 □

### 937 D.1 Proof of Theorem 3

938 *Proof of Theorem 3.* By initialization, we have  $\|\tilde{\mathbf{r}}_0\| = \|\tilde{\mathbf{r}}_{-1}\| = \|\mathbf{L} \mathbf{D}^\top\|_F$ . Let  $C_1$  to  $C_4$  be  
 939 constants defined in Lemma 10. Define  $\rho = 1 - \frac{\sqrt{\tilde{\mu}}}{\sqrt{\tilde{L}}}$ ,  $\theta = 1 - \frac{\sqrt{\tilde{\mu}}}{2\sqrt{\tilde{L}}}$ ,  $a_t = \sqrt{2} C_1 \|\mathbf{L} \mathbf{D}^\top\|_F$ , and  
 940  $b_t = C_1 \|\xi_t\|$  for  $t \geq 0$ . It is easy to verify that  $\beta \leq \theta^2 < \theta < 1$  and  $\rho < \theta < 1$ . By Lemmas 7 to 9  
 941 we have

$$a_{t+1} \leq \rho \cdot a_t + b_t$$

942 for all  $t \geq 0$ . It remains to show that  $b_t \leq \theta^t \cdot c_0$ . For the initial step,  $a_0 = \sqrt{2} C_1 \|\mathbf{L} \mathbf{D}^\top\|_F$ ,  $b_0 = 0$ .

943 Let  $C_1 = \frac{\tilde{\mu} p}{4\sqrt{2} \|\mathbf{L} \mathbf{D}^\top\|_F (1+p)}$  and  $C_2 = p\sqrt{\tilde{L}}$  where  $p = \frac{\sqrt{\tilde{\mu}}}{144\sqrt{\tilde{L}}} \leq \frac{1}{144} < 1$ , then we have

$$C_3 = \frac{\tilde{\mu} p^3}{8 \|\mathbf{L} \mathbf{D}^\top\|_F^2 (1+p)} \left( 2 + \sqrt{\frac{\tilde{\mu}}{\tilde{L}}} \right), \quad C_4 = \frac{\tilde{\mu} p^2}{2\sqrt{2} \|\mathbf{L} \mathbf{D}^\top\|_F} \left( 3 - \sqrt{\frac{\tilde{\mu}}{\tilde{L}}} \right).$$

944 Let  $c_0 = \sqrt{2} C_1 (\sqrt{2} C_3 \|\mathbf{L} \mathbf{D}^\top\|_F + C_4) \|\mathbf{L} \mathbf{D}^\top\|_F$ , then we can show the following relations: Given  
 945 our choice of constants, there hold

$$a_0 + \frac{c_0}{\theta - \rho} \leq \sqrt{2} C_1^2 \|\mathbf{A}\|_F \quad \text{and} \quad C_1 \geq 1. \quad (29)$$

946 Indeed, by (11), we have  $C_1 \geq 1$ . It remains to show

$$a_0 + \frac{c_0}{\theta - \rho} \leq \sqrt{2}C_1^2 \|\mathbf{LD}^\top\|_F,$$

947 which is equivalent to

$$\|\mathbf{LD}^\top\|_F + \frac{\sqrt{\tilde{\mu}\tilde{L}}p^3}{2\sqrt{2}(1+p)} \left(2 + \sqrt{\frac{\tilde{\mu}}{\tilde{L}}}\right) + \frac{\sqrt{\tilde{\mu}\tilde{L}}p^2}{\sqrt{2}} \left(3 - \sqrt{\frac{\tilde{\mu}}{\tilde{L}}}\right) \leq \frac{\tilde{\mu}p}{4\sqrt{2}(1+p)}.$$

948 By (11) and  $p = \frac{\sqrt{\tilde{\mu}}}{144\sqrt{\tilde{L}}} < 1$ , each one of the three terms on the left hand side is upper bounded by  
 949  $\frac{\mu p}{12\sqrt{2}(1+p)}$ , hence the inequality holds. (29) guarantees the induction conditions in Lemma 10, thus  
 950 we have

$$\|\tilde{\mathbf{r}}_{t+1}\| \leq \sqrt{2}C_1\theta^{t+1} \|\mathbf{LD}^\top\|_F \leq \frac{\tilde{\mu}}{576\|\mathbf{LD}^\top\|_F} \left(1 - \frac{\sqrt{\tilde{\mu}}}{2\sqrt{\tilde{L}}}\right)^{t+1} \|\mathbf{LD}^\top\|_F.$$

951 By Assumption 1, we have  $\text{row}(\mathbf{L}) \in \text{row}(\mathbf{D}) = \text{col}(\mathbf{D}^\top)$ , thus we have

$$\begin{aligned} \|\mathbf{R}_t\|_F &= \|\mathbf{X}_t \mathbf{Y}_t^\top \mathbf{D} - \mathbf{L}\|_F \\ &\leq \sigma_{\min}^{-1}(\mathbf{D}) \|(\mathbf{X}_t \mathbf{Y}_t^\top \mathbf{D} - \mathbf{L})\mathbf{D}^\top\|_F \\ &\leq \frac{\sigma_r^2(\mathbf{X}_0)\sigma_{\min}(\mathbf{D})}{576} \left(1 - \frac{\sigma_r(\mathbf{X}_0)\sqrt{\lambda_{\min}(\mathbf{D}\mathbf{D}^\top)}}{2\sigma_1(\mathbf{X}_0)\sqrt{\lambda_{\max}(\mathbf{D}\mathbf{D}^\top)}}\right)^t. \end{aligned}$$

952 □

## 953 D.2 Proof of Corollaries

954 *Proof of Corollary 1.* By Proposition 1,  $\text{cond}(\mathbf{X}_0) = O(\frac{d \cdot \text{cond}(\mathbf{L})}{\tau(d-r+1)})$  with probability at least  $1 - \delta$ ,  
 955 where  $\delta = 3e^{-\min\{(d-r+1) \log \frac{1}{c_1\tau}, c_2d, \frac{d}{2}\}}$ . Plugging it in Theorem 3 yields the result. □

956 *Proof of Corollary 2.* After orthonormalization, we have  $\text{cond}(\mathbf{X}_0) = 1$ . The result follows immedi-  
 957 ately from Theorem 3. □

958 *Proof of Corollary 3.* By Propositions 4 and 5,  $\text{cond}(\mathbf{X}_0) = O(\frac{d}{\tau(d-m+1)})$  with probability at least  
 959  $1 - \delta$ , where  $\delta = 3e^{-\min\{(d-m+1) \log \frac{1}{c_1\tau}, c_2d, \frac{d}{2}\}}$ . Plugging it in Theorem 3 yields the result. □
